1 **Previously uncharacterized rectangular bacteria in the dolphin mouth**

2

3 Natasha K. Dudek<sup>1,2,9</sup>, Jesus G. Galaz-Montoya<sup>3</sup>, Handuo Shi<sup>3,4</sup>, Megan Mayer<sup>5,10</sup>,  
4 Cristina Danita<sup>3</sup>, Arianna I. Celis<sup>4</sup>, Gong-Her Wu<sup>3</sup>, Barry Behr<sup>6</sup>, Kerwyn Casey Huang<sup>3,4,7</sup>,  
5 Wah Chiu<sup>3,4,5</sup>, David A. Relman<sup>1,4,7,8,11,\*</sup>

6

7 <sup>1</sup>Department of Medicine, Stanford University School of Medicine, Stanford, CA 94305, USA

8 <sup>2</sup>Department of Ecology and Evolutionary Biology, University of California, Santa Cruz, Santa  
9 Cruz, CA 95064, USA

10 <sup>3</sup>Department of Bioengineering, Stanford University, Stanford CA 94305, USA

11 <sup>4</sup>Department of Microbiology and Immunology, Stanford University School of Medicine, Stanford,  
12 CA 94305, USA

13 <sup>5</sup>Division of CryoEM and Bioimaging, SSRL, SLAC National Accelerator Laboratory, Menlo Park,  
14 CA 94025, USA

15 <sup>6</sup>Department of Obstetrics and Gynecology, Stanford University School of Medicine, Stanford, CA  
16 94305, USA

17 <sup>7</sup>Chan Zuckerberg Biohub, San Francisco, CA 94158, USA

18 <sup>8</sup>Infectious Diseases Section, Veterans Affairs Palo Alto Health Care System, Palo Alto, CA  
19 94304, USA

20 <sup>9</sup>Present address: Department of Computer Science, Mila-McGill University, Montreal, QC H3A  
21 0G4, Canada

22 <sup>10</sup>Present address: Department of Biological Chemistry and Molecular Pharmacology, Harvard  
23 Medical School, Boston, MA 02115, USA

24 <sup>11</sup>Lead Contact

25 \*Correspondence: [relman@stanford.edu](mailto:relman@stanford.edu)

26 **SUMMARY**

27

28 Much remains to be explored regarding the diversity of host-associated microbes. Here,  
29 we report the discovery of microbial structures in the mouths of bottlenose dolphins that  
30 we refer to as rectangular cell-like units (RCUs). DNA staining revealed multiple paired  
31 bands that suggested cells in the act of dividing along the longitudinal axis. Deep  
32 sequencing of samples enriched in RCUs through micromanipulation indicated that the  
33 RCUs are bacterial and distinct from *Simonsiella*, a genus with somewhat similar  
34 morphology and division patterning found in oral cavities of animals. Cryogenic  
35 transmission electron microscopy and tomography showed that RCUs are composed of  
36 parallel membrane-bound segments, likely individual cells, encapsulated by an S-layer-  
37 like periodic surface covering. RCUs displayed pilus-like appendages protruding as  
38 bundles of multiple threads that extend parallel to each other, and splay out at the tips  
39 and/or intertwine, in stark contrast to all known types of bacterial pili that consist of single,  
40 hair-like structures. These observations highlight the diversity of novel microbial forms  
41 and lifestyles that await discovery and characterization using tools complementary to  
42 genomics such as microscopy.

43

44 **KEYWORDS**

45 dolphin, microbiota, bacterial morphology, rectangular morphology, pili, S-layer,  
46 microscopy, cryo-transmission electron microscopy (cryoEM), cryo-electron tomography  
47 (cryoET), single-cell genomics

## 48 INTRODUCTION

49 The earliest descriptions of the microbial world centered around the morphology and  
50 motility patterns of 'animalcules' (Leeuwenhoek, 1677). In the centuries since  
51 Leeuwenhoek's revolutionary advance, a vast diversity of microbial forms have been  
52 discovered, ranging from star-shaped bacteria in the *Stella* genus (Nikitin et al., 1966;  
53 Vasilyeva, 1985) to the multicellular fruiting bodies characteristic of Myxobacteria  
54 (Dworkin, 1999; Voelz and Reichenbach, 1969). Morphology is a biologically important  
55 characteristic, often highly conserved and molded over time by selective pressures  
56 resulting from an organism's lifestyle and environmental context (Young, 2006). Indeed,  
57 cell morphology plays an important role in motility, nutrient acquisition, cell division, and  
58 interactions with other cells, including symbioses with hosts, all of which are strong  
59 determinants of survival (Young, 2007). As such, morphological and structural studies  
60 offer an appealing route by which to glean insight into microbial life forms and the  
61 mechanisms by which species function and affect their environments. Moreover,  
62 characterizing the structures and functions of the diverse range of microbes in uncharted  
63 branches of the tree of life provides an opportunity to broaden our understanding of  
64 evolution and may result in myriad applications in biotechnology and medicine,  
65 exemplified by the development of optogenetics (Fenno et al., 2011) and CRISPR-based  
66 gene editing (Ishino et al., 2018).

67

68 Genomics serves as a powerful lens through which to describe the microbial world. In  
69 recent years, metagenomic and single-cell genomic analyses have substantially  
70 increased the number of known microbial phylum-level lineages, by a factor of nearly four  
71 in the bacterial domain (Anantharaman et al., 2016; Brown et al., 2015; Castelle et al.,  
72 2015; Rinke et al., 2013). Sequencing the genomes of newly discovered organisms has

73 led to the discovery of new functional systems, types of protein variants, and lifestyles  
74 (Brown et al., 2015; Burstein et al., 2017; Donia et al., 2014; Dudek et al., 2017; Wrighton  
75 et al., 2012), illustrating the correlation between phylogenetic diversity and functional  
76 potential (Wu et al., 2009). However, the applicability of such approaches is mostly limited  
77 to proteins and regulatory systems homologous to those of well-characterized organisms;  
78 the prediction of phenotypes and functions that are truly novel and/or whose genetic basis  
79 is unknown generally requires complementary knowledge. Given the recalcitrance of the  
80 majority of the microbial species on Earth to laboratory culturing (Hug et al., 2016),  
81 microscopy offers an appealing route by which to study novel morphological and  
82 functional properties of uncultured lineages. Recent advances in cryo-electron  
83 microscopy and tomography have allowed for intact bacterial cells to be imaged in three  
84 dimensions at nanometer resolution (Pilhofer et al., 2010), leading to important advances  
85 in the discovery and characterization of new microbial structures (Moissl et al., 2005;  
86 Tocheva et al., 2010).

87  
88 Despite the diversity of microbial cell shapes, rectangular structures are a rarity, with a  
89 poorly understood genetic basis. Such structures are of two types: individual cells that  
90 are rectangular, and cell aggregates that form rectangles. To the best of our knowledge,  
91 the discovery of non-eukaryotic rectangular cells has thus far been restricted to the family  
92 Halobacteriaceae, which consists of halophilic Archaea. Known rectangular cells from this  
93 family include *Haloquadratum walsbyi* (Walsby, 1980), *Haloarcula quadrata* (Oren et al.,  
94 1999), and members of the pleomorphic genus *Natronrubrum* (Xu et al., 1999). Additional  
95 rectangular cells believed to be bacterial or archaeal have been discovered in high salinity  
96 environments but not taxonomically identified (Alam et al., 1984). Amongst eukaryotic  
97 microorganisms, diatoms can have a rectangular appearance (at least when visualized in

98 two dimensions), although these cells are cylindrical rather than rectangular prisms  
99 (Horner, 2002). A variety of bacteria form rectangular cell clusters, such as sheets of  
100 coccoid bacteria (for example, *Thiopedia rosea* and the genus *Merismopedia* (Zinder and  
101 Dworkin, 2006)), cuboidal structures of coccoid bacteria (for example, the genera *Sarcina*  
102 and *Eucapsis* (Zinder and Dworkin, 2006)), rectangular chains of filamentous bacteria (for  
103 example, the genus *Simonsiella* (Hedlund and Kuhn, 2006)), and rectangular trichomes  
104 formed by disc-shaped bacteria (for example, *Oscillatoria limosa* and other cyanobacteria  
105 (Zinder and Dworkin, 2006)).

106  
107 Also rare in the microbial world are cells that diverge from the typical pattern of cell  
108 division along a transverse axis. One spectacular example is the nematode symbiont  
109 *Robbea hypermnestra*, which divides along its longitudinal axis (Leisch et al., 2016).  
110 During division, *R. hypermnestra* cells form rectangles as they divide (as they are two  
111 adjacent cells) and form a protective sheath around the nematode. This division  
112 patterning is thought to preserve attachment to the host (Leisch et al., 2016). Similarly,  
113 members of the genus *Simonsiella* divide longitudinally, which is thought to help with  
114 adherence to human epithelial cells in the oral cavity (McCowan et al., 1979). Although  
115 both of these bacterial taxa are uncultivated, deep insights about their biology have been  
116 gleaned from microscopy-based studies. Such insight into the reproductive methods of  
117 diverse bacteria is essential for building a comprehensive understanding of cell biology.

118  
119 Previous studies using 16S rRNA gene amplicon sequencing and genome-resolved  
120 metagenomics found that the mouths of bottlenose dolphins (*Tursiops truncatus*) host a  
121 rich collection of novel microbes and functional potential (Bik et al., 2016; Dudek et al.,

122 2017). This diversity includes representatives from poorly characterized bacterial and  
123 archaeal phyla (Hug et al., 2016), some of which lack cultured representatives altogether  
124 and whose biology is therefore particularly poorly understood. To investigate the  
125 morphology and potential lifestyles of these novel microbial lineages, we surveyed  
126 dolphin oral microbial communities using various microscopy techniques. We discovered  
127 unusual rectangular cell-like units (RCUs) in dolphin oral samples and characterized their  
128 cellular dimensions and DNA patterning using phase-contrast and fluorescence  
129 microscopy. Regular bands of DNA suggested that the units are sheets of individual cells,  
130 and metagenomic sequencing strongly suggested that they are bacterial. Using cryogenic  
131 transmission electron microscopy (cryoTEM) and tomography (cryoET), we characterized  
132 the envelope structure of RCUs and discovered previously unobserved surface features  
133 such as heterogeneous bundles of appendages that protrude from the ends of RCUs and  
134 splay out at the tips. These findings highlight the power of high-resolution microscopy for  
135 exploring the nature of uncultivated microbes.

136

137

## 138 **RESULTS**

139

### 140 **Rectangular cells in the dolphin oral cavity are Gram-negative and contain multiple** 141 **bands of DNA**

142 We collected a total of 28 oral swab samples from the mouths of nine bottlenose dolphins  
143 (*Tursiops truncatus*) during two distinct intervals in 2012 and 2018, under the purview of  
144 the U.S. Navy Marine Mammal Program in San Diego Bay, California, USA (**Methods**).  
145 In phase-contrast images, rectangular cell-like units (RCUs) were readily apparent in 20  
146 of the 28 samples (**Figure 1A-E**), including at least one sample from each of the nine

147 dolphins (**Table S1**). The RCUs resembled rectangular “pancakes” (**Movie S1**) and  
148 exhibited Gram-negative characteristics following Gram staining (**Figure 1F**). RCUs  
149 contained multiple parallel bands of fluorescence with DAPI staining (**Figure 1B,C,D,E**).  
150 In some RCUs, the neighboring DNA band pairs formed “H”-like shapes (**Figure 1G**, white  
151 arrow), suggesting two rod-shaped cells in the process of division along a longitudinal  
152 axis with the DNA bands undergoing segregation. RCUs clustered into two morphotypes  
153 based on the length of the DAPI-stained bands. In the “long DAPI-band” morphotype  
154 (**Figure 1B,C**), the individual DAPI-stained bands tended to be longer than their “short  
155 DAPI-band” morphotype counterparts (**Figure 1D,E**); the nomenclature does not refer to  
156 the number of bands per RCU). We segmented and quantified the dimensions for the two  
157 morphotypes (**Figure 1H**, inset), and found that the “short DAPI-band” morphotype  
158 exhibited smaller width and length compared to the “long DAPI-band” morphotype  
159 (**Figure 1H**). The different morphotypes may represent different cell types or taxonomic  
160 groups (for example, strains or species), cells in different stages of development, or cells  
161 with altered shape in response to environmental conditions. We focused on cells with long  
162 DAPI bands, as this morphotype was more prevalent in the dolphin oral samples.

163

#### 164 **RCUs are likely bacterial and not members of the genus *Simonsiella***

165 Given the intriguing morphology of RCUs, we next sought to determine their taxonomy  
166 and phylogenetic affiliations. RCUs bear qualitative resemblance to members of the  
167 genus *Simonsiella*, which consist of rod-shaped bacteria that collectively form a  
168 rectangular unit and are oral commensals in mammals (Hedlund and Kuhn, 2006). Thus,  
169 we first sought to evaluate the likelihood that RCUs are members of this genus. In a re-  
170 analysis of the Sanger clone library and 454 pyrosequencing data from a previous 16S  
171 rRNA gene amplicon survey of gingival swab samples from 38 dolphins from the same

172 population (Bik et al., 2016), no *Simonsiella* amplicons were detected in any of these  
173 samples. *Simonsiella* was detected in the Sanger library from the mouth and gastric fluid  
174 of a sea lion examined in the same amplicon study, confirming that *Simonsiella* DNA can  
175 be extracted successfully with the protocol used in this and the previous study (Bik et al.,  
176 2016). We next selected three new dolphin oral samples that we visually confirmed to  
177 contain RCUs and performed 16S rRNA amplicon sequencing (**Methods**), resulting in the  
178 detection of 394 amplified sequence variants (ASVs) with 991,592 amplicon reads across  
179 the three samples (**Figure 2**). Thirty-one ASVs from 21 taxa were shared among the three  
180 dolphin oral samples and are thus potential RCU ASV candidates (**Table S2**). No  
181 *Simonsiella* amplicons were detected in these three samples.

182  
183 The marine origin and rectangular nature of the RCUs also gave rise to speculation that  
184 they may be marine diatoms (for example, *Skeletonema costatum*), as cylindrical marine  
185 diatoms may appear rectangular in two dimensions. Thus, we next sought evidence of  
186 eukaryotic RCU origin. We performed fluorescence *in situ* hybridization (FISH) using  
187 labeled eukaryotic (Euk-1209) and bacterial (Eub-338) probes, the latter of which is  
188 known to hybridize with both bacteria and archaea. As controls, we cultured and included  
189 *S. costatum* and the bacterium *Escherichia coli*. The Eub-338 probe hybridized to both *E.*  
190 *coli* and the RCUs, while the Euk-1209 eukaryotic probe hybridized to *S. costatum* cells  
191 alone (**Figure 3**), indicating that RCUs are not eukaryotic and thus not diatoms.

192  
193 With no further *a priori* hypotheses as to the specific nature of the RCUs, we pursued a  
194 variety of general approaches to shed light on their identity. First, we cultured oral  
195 samples under aerobic and anaerobic conditions in three different media used to grow  
196 diverse bacteria (Methods), hoping to enrich for RCUs. Unfortunately, RCUs were not



197 visible upon inspection of cultures under a microscope, indicating that the growth  
198 requirements for RCUs are distinct from those for typical bacteria isolated from  
199 mammalian microbiotas.

200

201 Our next strategy employed single-cell genomics. Notably, this approach largely avoids  
202 preconceived biases about possible identity, since single-cell genomics should detect  
203 DNA from any cell from any domain of life, assuming successful cell lysis. We used three  
204 techniques to capture rectangular cells for genomic sequencing: laser capture  
205 microdissection, microfluidics, and cell micromanipulation. Due to their large size  
206 compared with other bacteria, low density, and the propensity of RCUs to stick to other  
207 cells and to abiotic surfaces, only micromanipulation led to successful RCU capture  
208 (**Figure S1**). In addition to four collection tubes each containing ~1-3 RCUs, four negative-  
209 control tubes of sample fluid were collected with the micropipette without any cells visible  
210 at the resolution of our microscope. Cell-free DNA and small non-target cells were also  
211 likely collected along with the RCUs, given the frequent close proximity of RCUs to other  
212 cells. DNA from RCU-positive and -negative samples was amplified using multiple  
213 displacement amplification (MDA), co-assembled, and sorted into 18 genome bins  
214 (**Figure 4; Figure S2; Tables S3, S4; Methods**). In addition to providing several  
215 candidate identities for the RCUs, this experiment provided further evidence against the  
216 RCUs being marine diatoms or *Simonsiella*, as no bins were assigned to either of these  
217 taxonomic groups. The eukaryotic bins matched the human genome or the fungal class  
218 Malasseziomycetes, members of which are known commensals of human skin (Limon et  
219 al., 2017), and hence likely represent contaminants. No archaeal bins were recovered.

220

221 The lack of a consistent, shared, and abundant set of genome sequences (likely due to  
222 contamination from different non-RCU cells and/or lack of recovery of RCU DNA from  
223 positive samples) precluded a confident taxonomic identification of the RCUs. When we  
224 excluded bins that were present in any negative control with  $\geq 1\%$  relative abundance (an  
225 admittedly arbitrary threshold) and for which an ASV from the same taxonomic group was  
226 detected in all three dolphin oral samples that underwent amplicon sequencing, six  
227 candidate taxa remained: 1) phylum Bacteroidetes, genus *Tenacibaculum* (76%  
228 complete); 2) phylum Epsilonproteobacteria, genus *Arcobacter* (76% complete); 3)  
229 Epsilonproteobacteria, family Campylobacteraceae (14% complete); 4) phylum  
230 Gammaproteobacteria, family Moraxellaceae (58% complete); 5) Gammaproteobacteria,  
231 unknown family (0% complete, i.e. there were assembled scaffolds in the bin even though  
232 they did not encode marker genes used to estimate completeness; **Figure S3**); and 6)  
233 Gammaproteobacteria, unknown family (83% complete). The relatively well-studied  
234 genera *Tenacibaculum* and *Arcobacter* are unlikely candidates for RCU taxonomy, and  
235 are more likely to be contaminants. If each RCU were comprised of  $\sim 8$  cells (segments)  
236 and the co-assembly were based on samples from  $>4$  RCUs, then the larger copy number  
237 of RCU genomes should have resulted in better quality genome assembly, suggesting  
238 that a true RCU bin should have greater completeness, suggesting general technical  
239 challenges faced by genomic approaches.

240

### 241 **CryoEM reveals nanoscale surface and internal structures of RCUs**

242 To gain high-resolution structural insight into RCUs, we imaged dolphin oral samples  
243 containing high densities of RCUs using cryogenic transmission electron microscopy  
244 (cryoTEM). Low-magnification cryoTEM images revealed that each RCU consists of  
245 seemingly paired segments organized in parallel (**Figure 5A,B**); these segments were

246 oriented similar to the DAPI-stained bands seen in fluorescence microscopy images  
247 (**Figure 1C,E**). Groups of segments sometimes appeared to be in the act of separating  
248 from other groups, although our static data cannot definitively say whether this  
249 appearance was reflective of cell division. Segments were surrounded by a dense,  
250 membrane-like layer under a low-density layer (**Figures 6A,B (right) and 7A; Movies**  
251 **S2, S3**).

252

253 We hypothesized that RCUs are most likely aggregates of cells, with each DNA-  
254 containing segment, an individual cell. The following observations support this  
255 hypothesis: 1) segments appeared to be surrounded as a group by surface structures  
256 reminiscent of plasma membranes and/or cell walls (**Figures 6A,B (right) and 7A**); 2)  
257 segments are arranged in the same geometry (**Figure 5A,B**) as the DAPI-stained bands  
258 and FISH probe-hybridized bands (**Figure 1C,E,G**); 3) appendages protruded from the  
259 surface of individual segments (**Figure 5C,D**) ; 4) RCUs often consisted of groups of  
260 variable numbers of segments that appeared to be separating from one another (**Figures**  
261 **1D,E and 6B**), suggesting that the rectangular structures do not reflect an individual cell.

262

263 Dark, spherical structures that were visible in the body of the RCUs in cryoTEM images  
264 may be storage and/or lipid granules. In one tomogram, two dense spheroidal objects  
265 (**Figure 5C**) were prominently visible and measured  $192 \text{ nm} \times 200 \text{ nm} \times 192 \text{ nm}$  (volume  
266  $3.1 \times 10^7 \text{ nm}^3$ ) and  $215 \text{ nm} \times 220 \text{ nm} \times 220 \text{ nm}$  (volume  $4.4 \times 10^7 \text{ nm}^3$ ). Vesicle-like  
267 structures were also apparent. Notably, a surface covering with a periodicity of  $\sim 7\text{-}9 \text{ nm}$   
268 encapsulated the RCUs (**Figures 6 and 7; Movies S2, S3**).

269

270 To obtain more detailed three-dimensional reconstructions of RCU features, we  
271 conducted cryoET experiments. Tilt-series acquisitions were limited to the RCU periphery  
272 since the thickness of the RCU bodies occluded the electron beam at high tilt angles. The  
273 thickness at the RCU periphery (<1  $\mu\text{m}$  from the edge) ranged from ~323 nm to ~751 nm,  
274 with an average value of ~509 nm ( $n=15$ ). Appendages that resembled pili (Hospenthal  
275 et al., 2017; Proft and Baker, 2009) protruded from RCUs; these appendages often  
276 consisted of parallel, hair-like structures that formed bundles and splayed out at the tips,  
277 sometimes intertwining and/or crossing over one another (**Figures 6B and 7B,C**). The  
278 bundles of appendages were structurally heterogeneous, with variable lengths, bundle  
279 widths, and numbers of tips. Notably, in examining the various features within the  
280 tomograms, we did not observe any membrane-bound organelles reminiscent of a  
281 nucleus, in line with a non-eukaryotic identity.

282  
283 For both the appendages and periodic surface covering, subtomogram averaging (Galaz-  
284 Montoya and Ludtke, 2017) did not yield consistent maps, likely due to the thickness of  
285 the RCUs (often >500-600 nm thick), low signal-to-noise ratio of the tomograms, and  
286 intrinsic characteristics of the features in question, such as the high and variable curvature  
287 of the regions with a continuous periodic surface covering. These cell surface features,  
288 which are essential for a cell's interaction with its environment, merit future investigation  
289 as they defy the conventional wisdom that pili-like appendages are single, hair-like  
290 structures (Hospenthal et al., 2017; Proft and Baker, 2009), and that periodic surface  
291 coverings (such as S-layers) encapsulate a single cell (Fagan and Fairweather, 2014;  
292 Sleytr et al., 2007) rather than a collection of cells.

293

294

295 **DISCUSSION**

296 Here, we used optical microscopy, cryoTEM, and cryoET to search for novel  
297 morphological diversity within the microbiota of dolphin oral samples, which was predicted  
298 based on previous findings of novel phylogenetic diversity and functional potential in the  
299 dolphin mouth via sequencing-based studies (Bik et al., 2016; Dudek et al., 2017).  
300 Interestingly, we discovered morphologically unusual RCUs. We infer that they are  
301 endemic to the dolphin mouth given that they were consistently present in this  
302 environment: they were identified in 20 out of 28 samples investigated, including in at  
303 least one sample from all nine dolphins included in this study, and were present in  
304 samples collected during intervals six years apart. Previous studies have found that the  
305 microbiota of marine mammals is distinct from that of seawater (even that of skin, which  
306 is constantly in direct contact with seawater) (Apprill et al., 2011; Bik et al., 2016), and  
307 thus it is unlikely that RCUs are simply contaminants from seawater.

308  
309 The taxonomic identification of specific cell morphotypes from complex communities can  
310 be extremely difficult, to the point that it often remains unresolved (Alam et al., 1984; Luef  
311 et al., 2015; Wanger et al., 2008). Results from DAPI staining, cryo-EM imaging, FISH,  
312 and single-cell genomics indicate that the RCUs are bacterial, and 16S rRNA amplicon  
313 sequence-based surveys and single-cell genomics suggest that RCUs are distinct from  
314 species in the genus *Simonsiella*, a bacterial taxon whose members also form  
315 rectangularly-shaped clusters of rod-like cells. Obtaining a species-level identification via  
316 sequencing-based methods will be extremely challenging for numerous reasons, such as  
317 the frequent close proximity of RCUs with other small cells that were likely mixed with  
318 RCUs during micromanipulation or recalcitrance to laboratory lysis. Importantly, we are  
319 hesitant to exclude candidate identities based on not being present in all positive RCU

320 samples, since technical limitations could have resulted in false negatives. For example,  
321 a thick cell wall or obstruction preventing reagents from reaching the RCU by the  
322 micropipette needle could have interfered with lysis of the cell membrane and impeded  
323 DNA extraction. Conversely, a positive result in a negative control may have arisen due  
324 to non-specific read mapping, contamination of genome bins with material from true  
325 contaminants, or cell-free DNA. Culturing-based approaches may ultimately be the most  
326 promising route forward for identifying RCUs, although many combinations of parameters  
327 will likely need to be tested to find satisfactory conditions for RCU growth. If RCUs are  
328 strictly anaerobic, culturing may be further complicated since swabs cannot be collected  
329 from the mouths of live dolphins without exposure to the atmosphere during the collection  
330 process. Regardless of the taxonomic identity of the RCUs, the novel structural features  
331 that have evolved in these microorganisms are intriguing and highlight the discovery  
332 potential for further study.

333

334 The paired nature of segments in RCUs can likely be explained by longitudinal binary  
335 fission behavior, as seen in members of the *Simonsiella* genus and *R. hypermnestra*  
336 (Leisch et al., 2016; Steed, 1962). In *Simonsiella*, sheets are thought to help cells stay  
337 physically anchored in the oral cavity when rapidly shedding epithelial cells slough off  
338 (McCowan et al., 1979). We hypothesize that the same may be true for RCUs, which  
339 inhabit a similar environment and whose morphology may have undergone convergent  
340 evolution due to similar evolutionary pressures. Longitudinal binary fission may be an  
341 even more general characteristic that is selected in response to the need to form a secure  
342 attachment to a substrate. The segments at the ends of RCUs are often shorter than  
343 those closer to the center, suggesting that there may be a mechanism by which the growth  
344 of segments is determined by their spatial positioning within an RCU.

345

346 CryoTEM images suggested that RCUs are encapsulated by a periodic surface covering,  
347 which may be an S-layer or a new crystalline structure. S-layers are self-assembling,  
348 crystalline arrays of single proteins or glycoproteins that coat the exterior of some bacteria  
349 and archaea (Fagan and Fairweather, 2014; Sleytr et al., 2007). While their exact function  
350 varies widely across microorganisms and is often unknown, S-layers are hypothesized to  
351 confer beneficial functions given their high metabolic cost (the S-layer comprises up to  
352 ~20% of the total protein synthesized by cells), their ubiquity across microbes, and their  
353 multiple evolutionary origins (Fagan and Fairweather, 2014; Sleytr et al., 2007). If  
354 segments in RCUs correspond to individual cells, production of the periodic surface  
355 covering may represent cooperation between cells in RCUs. Cooperative synthesis of a  
356 single, shared periodic surface covering by multiple cells could have evolved since close  
357 kin (other cells in an RCU) have limited dispersal ability and are therefore situated in close  
358 physical proximity. RCUs would benefit from cooperative production of a single periodic  
359 surface covering around a population of cells rather than around each individual segment  
360 by reducing the surface area required to cover all cells, and such an advantage could  
361 even have contributed to selection for aggregation. An additional and not mutually  
362 exclusive possibility is that the periodic surface covering may help to maintain the  
363 ultrastructure of segments within an RCU, similar to archaea such as *Thermoproteus*  
364 *tenax* (Wildhaber and Baumeister, 1987).

365

366 One of the most striking features of RCUs is their pilus-like appendages. At present, there  
367 are five characterized classes of pili in Gram-negative bacteria (Chaperone-usher, Curli  
368 fibers, F-type, type IV, and type V) and two general types of pili in Gram-positive bacteria  
369 (short, thin rods and longer, flexible, hair-like filaments) (Hospenthal et al., 2017; Proft

370 and Baker, 2009); other pilus-like appendages have been documented, such as hami in  
371 archaea (Moissl et al., 2005). To the best of our knowledge, characterized bacterial pili  
372 all consist of single appendages that exist as independent units. By contrast, the pilus-  
373 like appendages that protrude from RCU segments exhibit an unusual architecture  
374 involving heterogeneous bundles of parallel filaments that often splay out at the tips.  
375 These observations raise the question of whether the RCU appendages represent a novel  
376 type of assembly of pilin subunits, or are a completely distinct class of appendages.

377

378 Extensive investigation of hundreds of cryoET tomograms enabled visualization of the  
379 structure of many RCU features at high resolution. Future studies of RCUs may benefit  
380 from imaging with phase-plate optics that dramatically increase image contrast (Danev  
381 and Baumeister, 2017) following specimen preparation methods that thin cells into  
382 lamellae by focused ion beam (FIB) milling coupled with scanning electron microscopy  
383 (SEM) at cryogenic temperatures (Marko et al., 2007; Wu et al., 2020). Such approaches  
384 could enable a comprehensive analysis of the community of RCUs as well as higher  
385 resolution structural details of subcellular components of interest via subtomogram  
386 averaging.

387

388 The vast majority of microorganisms on Earth lack isolated representatives (Hug et al.,  
389 2016). Sequencing-based analyses have proved invaluable in exploring and describing  
390 said diversity, yet cannot be used to explore all aspects of the biology of microorganisms.  
391 Notable blind spots in our understanding of uncultured organisms include the unique  
392 genes and corresponding structural and functional features that have evolved within these  
393 lineages. While the use of advanced imaging techniques to visualize microbes can  
394 provide insight into the biology of uncultured lineages, a shift toward a more multifaceted



395 approach drawing on many disciplines and techniques will be required to create a  
396 comprehensive view of this biological dark matter (Castelle and Banfield, 2018;  
397 Ponomarova and Patil, 2015).

398

399

## 400 **ACKNOWLEDGMENTS**

401 We thank members of the Relman lab for insightful discussion, Katharine Ng, and Brian  
402 Yu for assistance in attempts to capture RCUs using laser capture microdissection and  
403 microfluidics, respectively, and Melissa Clark for assistance with Gram staining, Michael  
404 Schmid for analysis of the periodic surface covering on RCUs, and especially Celeste  
405 Parry and colleagues at the U.S. Navy Marine Mammal Program in San Diego, CA for  
406 collecting dolphin oral samples. This work was supported by NIH grant P41GM103832  
407 (W.C.), a James S. McDonnell Postdoctoral Fellowship (H.S.), and the Thomas C. and  
408 Joan M. Merigan Endowment at Stanford University (D.A.R.). K.C.H. and D.A.R. are Chan  
409 Zuckerberg Biohub Investigators.

410

## 411 **AUTHOR CONTRIBUTIONS**

412 Conceptualization: N.K.D, K.C.H., D.A.R.

413 Methodology and investigation: N.K.D., J.G.G.M., H.S., M.M., C.D., G.H.W, B.B., K.C.H,  
414 W.C., D.A.R.

415 Formal analysis: N.K.D, J.G.G.M., H.S., C.D.

416 Visualization: N.K.D, J.G.G.M, H.S., C.D.

417 Writing - original draft: The manuscript was mainly written by N.K.D. and J.G.G.M. based  
418 on N.K.D.'s original draft, with revisions by all other authors.

419 Writing - review and editing: all authors.

420 Supervision: K.C.H, W.C., D.A.R.

421

422 **DECLARATIONS OF INTEREST**

423 The authors declare no competing interests.

424 **FIGURE LEGENDS**

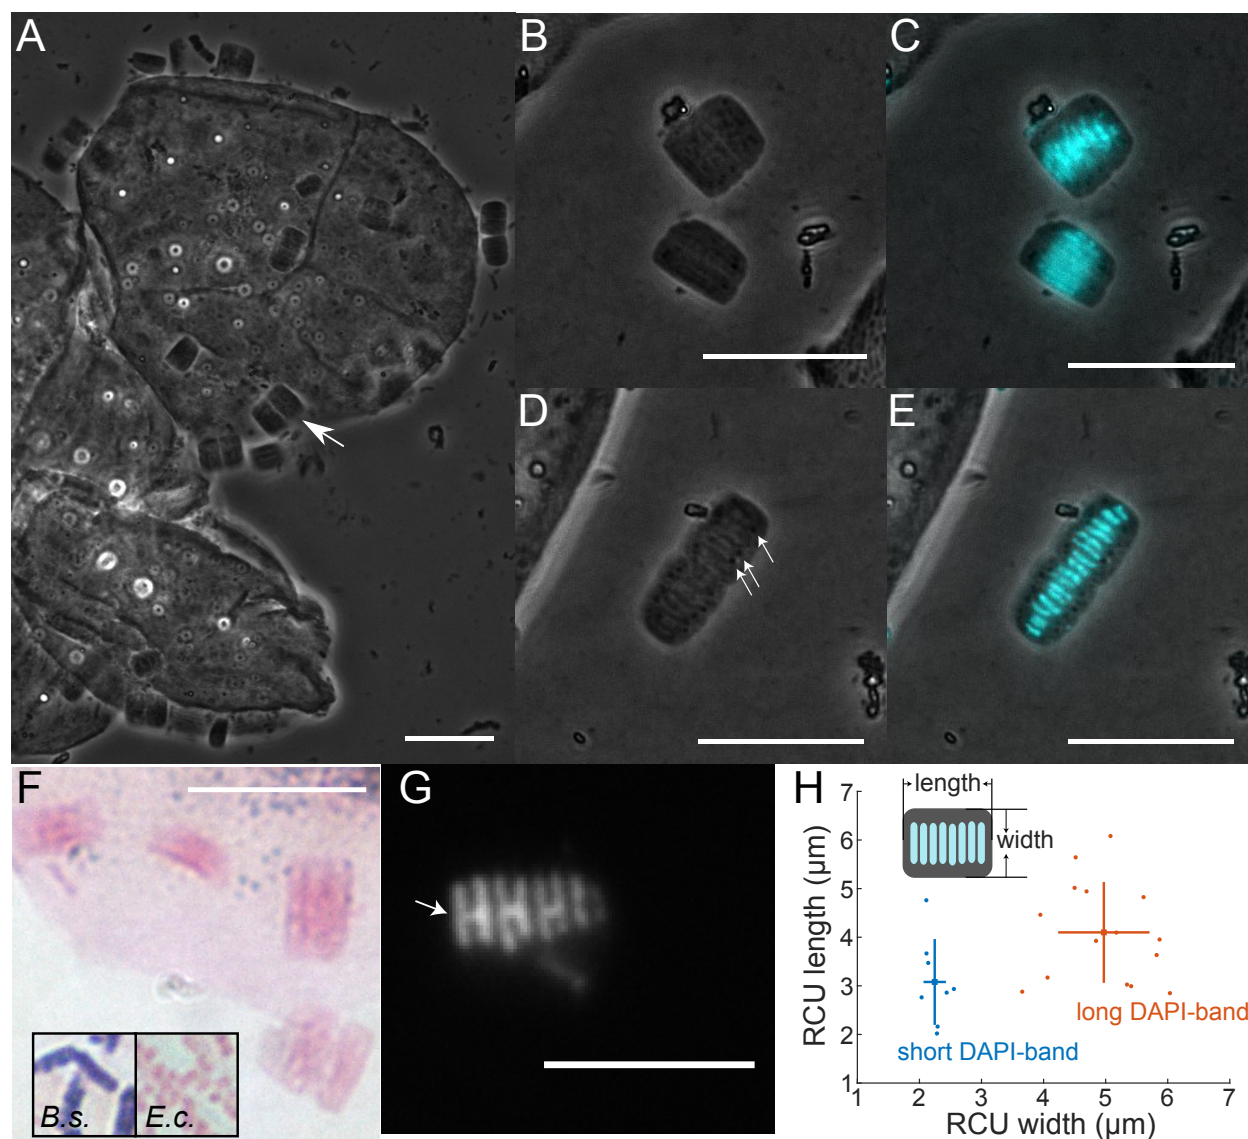

425  
426 **Figure 1. Light microscopy reveals RCUs with multiple morphotypes and distinct**  
427 **DNA banding patterns.**

428 A) Phase-contrast images of RCUs (arrow indicates one example) on the surface of  
429 dolphin oral epithelial cells. See also **Movie S1**. Scale bar: 10 µm.

430 B,C) Some RCUs exhibited long bands of DAPI fluorescence. Phase-contrast image  
431 is shown in (B), with fluorescence overlay in cyan in (C). Scale bars: 10 µm.

432 D,E) Other RCUs exhibited shorter DAPI bands. Phase-contrast image is shown in  
433 (D), with fluorescence overlay in cyan in (E). Dark spots (arrowheads) were

434 organized in lines perpendicular to DAPI-stained bands. DAPI-stained bands  
435 appeared to be organized in pairs. Scale bars: 10  $\mu\text{m}$ .

436 F) Gram-stained RCUs display Gram-negative characteristics. Inset: Gram-stained  
437 *Bacillus subtilis* (*B.s.*, Gram-positive) and *Escherichia coli* (*E.c.*, Gram-negative).  
438 Scale bar: 10  $\mu\text{m}$ .

439 G) Neighboring DNA band pairs in an RCU form “H”-like shapes (white arrow), likely  
440 because the DNA bands are nucleoids segregating in a cell undergoing  
441 longitudinal division. Scale bar: 10  $\mu\text{m}$ .

442 H) The two RCU morphotypes have distinct distributions of length and width.

443

444

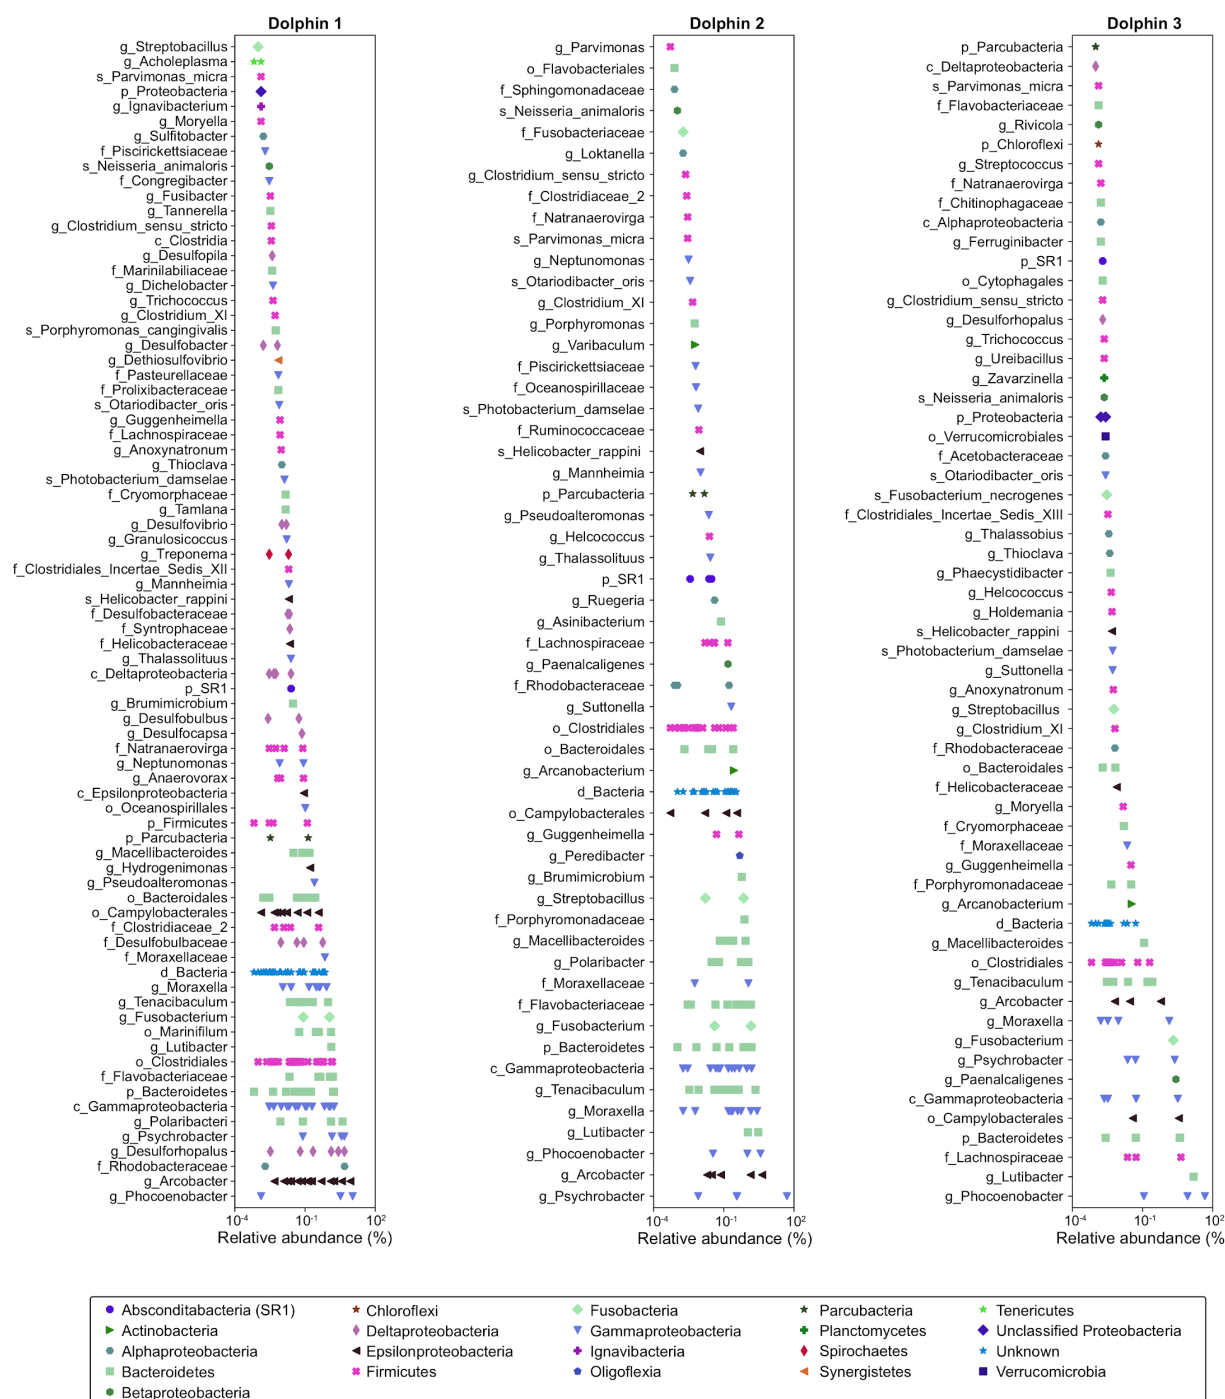

445

446 **Figure 2. 16S rRNA amplicon sequencing of dolphin oral samples indicates that**

447 **RCUs are not affiliated with the *Simonsiella* genus.** Three dolphin oral samples

448 visually confirmed to contain RCUs were subjected to 16S rRNA gene amplicon

449 sequencing. All detected ASVs are shown. Each row shows ASVs with their lowest

450 taxonomic assignment (level denoted by prefix such as “s\_\_” for species). Taxonomic  
451 groups are color-coded by phylum, with the polyphyletic Proteobacteria group shown at  
452 the level of Class.

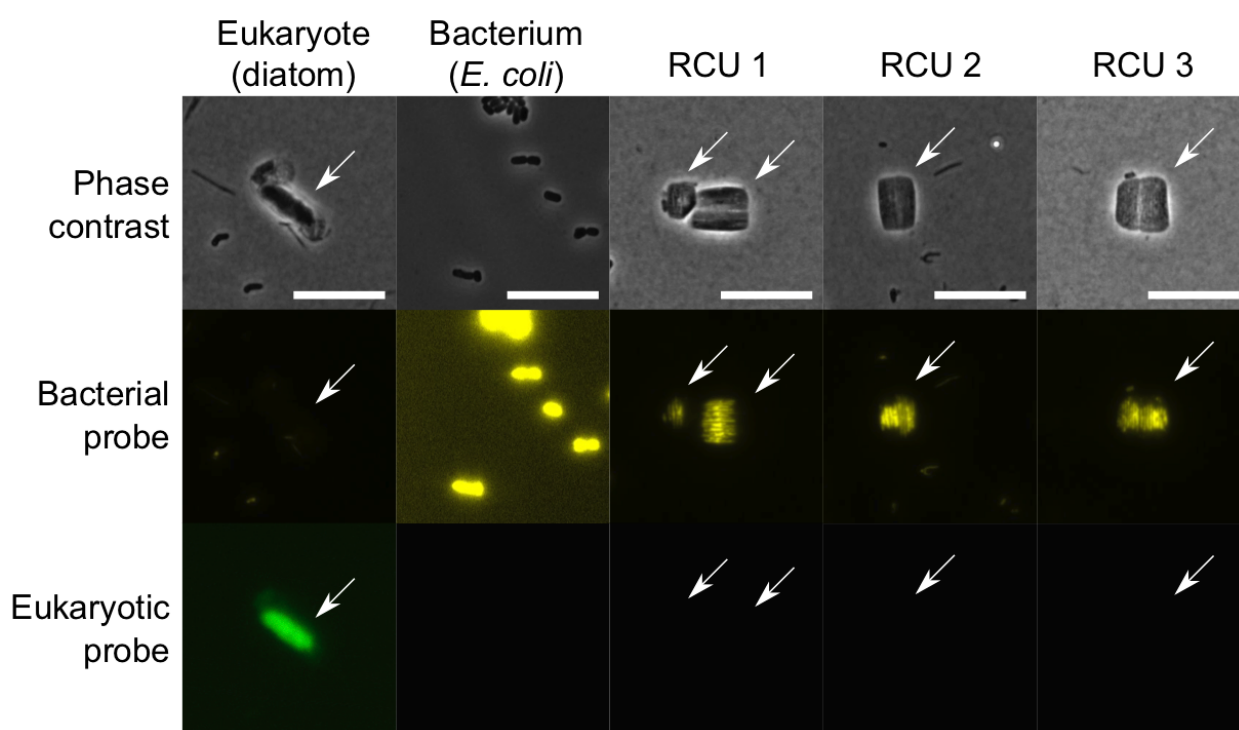

453

454 **Figure 3. Fluorescence in situ hybridization indicates that RCUs are bacterial rather**  
455 **than eukaryotic.** Bacterial probe Eub-338 was labeled with AlexaFluor-488 and  
456 eukaryotic probe Euk-1209 was labeled with AlexaFluor-660. Top: phase-contrast  
457 images; middle, bottom: fluorescence images from bacterial and eukaryotic probes,  
458 respectively. Arrows indicate the relevant cells in non-axenic samples. The first column is  
459 a cell of the marine diatom *Skeletonema costatum* grown in non-axenic culture. The  
460 second column is axenic *Escherichia coli* cells. The last three columns are RCUs obtained  
461 directly from dolphin oral swabs. All RCUs were labeled with the bacterial probe, while  
462 the eukaryotic probe only labeled the marine diatom. Scale bars: 10  $\mu$ m.

| Domain    | Phylum                | Lowest taxonomic ID   | Bin ID | RCU    |        |        |        | Neg |     |     |     | Criteria |     |       |     |  |  |   |
|-----------|-----------------------|-----------------------|--------|--------|--------|--------|--------|-----|-----|-----|-----|----------|-----|-------|-----|--|--|---|
|           |                       |                       |        | 1      | 2      | 3      | 4      | 1   | 2   | 3   | 4   | 1        | 2   | 3     |     |  |  |   |
| Bacteria  | Gammaproteobacteria   | c_Gammaproteobacteria | 18     | Green  | Yellow | Yellow | Green  | Red | Red | Red | Red | Red      | Red | Green |     |  |  |   |
| Bacteria  | Epsilonproteobacteria | g_Arcobacter          | 4      | Red    | Yellow | Red    | Yellow | Red | Red | Red | Red | Red      | Red | Red   | Red |  |  |   |
| Bacteria  | Gammaproteobacteria   | c_Gammaproteobacteria | 15     | Green  | Green  | Yellow | Green  | Red | Red | Red | Red | Red      | Red | Red   | Red |  |  |   |
| Bacteria  | Bacteroidetes         | g_Tenacibaculum*      | 11     | Yellow | Yellow | Red    | Green  | Red | Red | Red | Red | Red      | Red | Red   | Red |  |  |   |
| Bacteria  | Epsilonproteobacteria | f_Campylobacteraceae* | 3      | Red    | Red    | Red    | Yellow | Red | Red | Red | Red | Red      | Red | Red   | Red |  |  |   |
| Bacteria  | Gammaproteobacteria   | c_Gammaproteobacteria | 10     | Green  | Green  | Yellow | Green  | Red | Red | Red | Red | Red      | Red | Red   | Red |  |  |   |
| Bacteria  | Gammaproteobacteria   | f_Moraxellaceae*      | 13     | Green  | Yellow | Green  | Yellow | Red | Red | Red | Red | Red      | Red | Red   | Red |  |  |   |
| Bacteria  | Bacteroidetes         | f_Flavobacteriaceae   | 12     | Green  | Green  | Yellow | Green  | Red | Red | Red | Red | Red      | Red | Red   | Red |  |  |   |
| Bacteria  | Fusobacteria          | g_Fusobacterium       | 6      | Yellow | Yellow | Red    | Yellow | Red | Red | Red | Red | Red      | Red | Red   | Red |  |  |   |
| Bacteria  | Betaproteobacteria    | f_Alcaligenaceae      | 16     | Green  | Red    | Red    | Yellow | Red | Red | Red | Red | Red      | Red | Red   | Red |  |  |   |
| Bacteria  | Fusobacteria          | g_Oceanivirga         | 14     | Yellow | Yellow | Red    | Yellow | Red | Red | Red | Red | Red      | Red | Red   | Red |  |  |   |
| Bacteria  | Gammaproteobacteria   | g_Pasteurella*        | 17     | Yellow | Green  | Yellow | Green  | Red | Red | Red | Red | Red      | Red | Red   | Red |  |  |   |
| Bacteria  | Bacteroidetes         | g_Porphyrromonas*     | 9      | Yellow | Yellow | Red    | Yellow | Red | Red | Red | Red | Red      | Red | Red   | Red |  |  |   |
| Eukaryota | Fungi                 | c_Malasseziomycetes   | 8      | Red    | Red    | Red    | Red    | Red | Red | Red | Red | Red      | Red | Red   | Red |  |  |   |
| Eukaryota | Metazoa               | s_Human               | 1      | Red    | Red    | Red    | Red    | Red | Red | Red | Red | Red      | Red | Red   | Red |  |  |   |
| Bacteria  | Gracilibacteria       | p_Gracilibacteria     | 5      | Green  | Green  | Red    | Yellow | Red | Red | Red | Red | Red      | Red | Red   | Red |  |  | + |
| Bacteria  | Gracilibacteria       | p_Gracilibacteria     | 2      | Green  | Yellow | Yellow | Green  | Red | Red | Red | Red | Red      | Red | Red   | Red |  |  | + |
| Bacteria  | Actinobacteria        | f_Corynebacteriaceae* | 7      | Red    | Red    | Red    | Red    | Red | Red | Red | Red | Red      | Red | Red   | Red |  |  |   |

463

464 **Figure 4. Insights into RCU identity.** The 18 bins recovered from MDA and sequencing

465 of RCU samples collected via micromanipulator, along with the Phylum from which they

466 are inferred to derive. For lowest taxonomic identity achieved (or Class, in the case of the

467 polyphyletic Proteobacteria), an asterisk (\*) denotes lower confidence in the assignment

468 (Methods). The RCU panel shows relative abundances of bins in each of the four samples

469 that contained RCUs based on visualization, color-coded as follows: green:  $\geq 5\%$ , yellow:

470  $\geq 1\%$  and  $< 5\%$ , orange:  $> 0\%$  and  $< 1\%$ , red:  $0\%$ . The negative-control panel (Neg)

471 presents the same information for each of the samples that did not appear to contain

472 RCUs. Criteria for gauging the likelihood of a bin deriving from the RCUs are shown. (1)

473 Was the bin ever present in negative controls (green = no, yellow = yes but never  $\geq 1\%$

474 relative abundance, orange = yes but never  $\geq 5\%$ , red = yes and at least once  $\geq 5\%$ ). (2)

475 Of ASVs shared between the three dolphin oral samples that produced the RCU panel,

476 was any shared ASV a putative candidate for the bin? For example, bin 14 was identified

477 as from the family Oceanivirga; was any shared ASV a member of Oceanivirga? (green

478 = yes, red = no). (3) Are members of a given phylum known to be Gram-negative (green



479 = yes, red = no)? A “†” denotes that members of the Gracilibacteria phylum are inferred  
480 not to be Gram-negative from genomic studies (although they are not necessarily Gram-  
481 positive) (Meheust et al., 2019). Highest likelihood candidates are green for all three  
482 criteria.

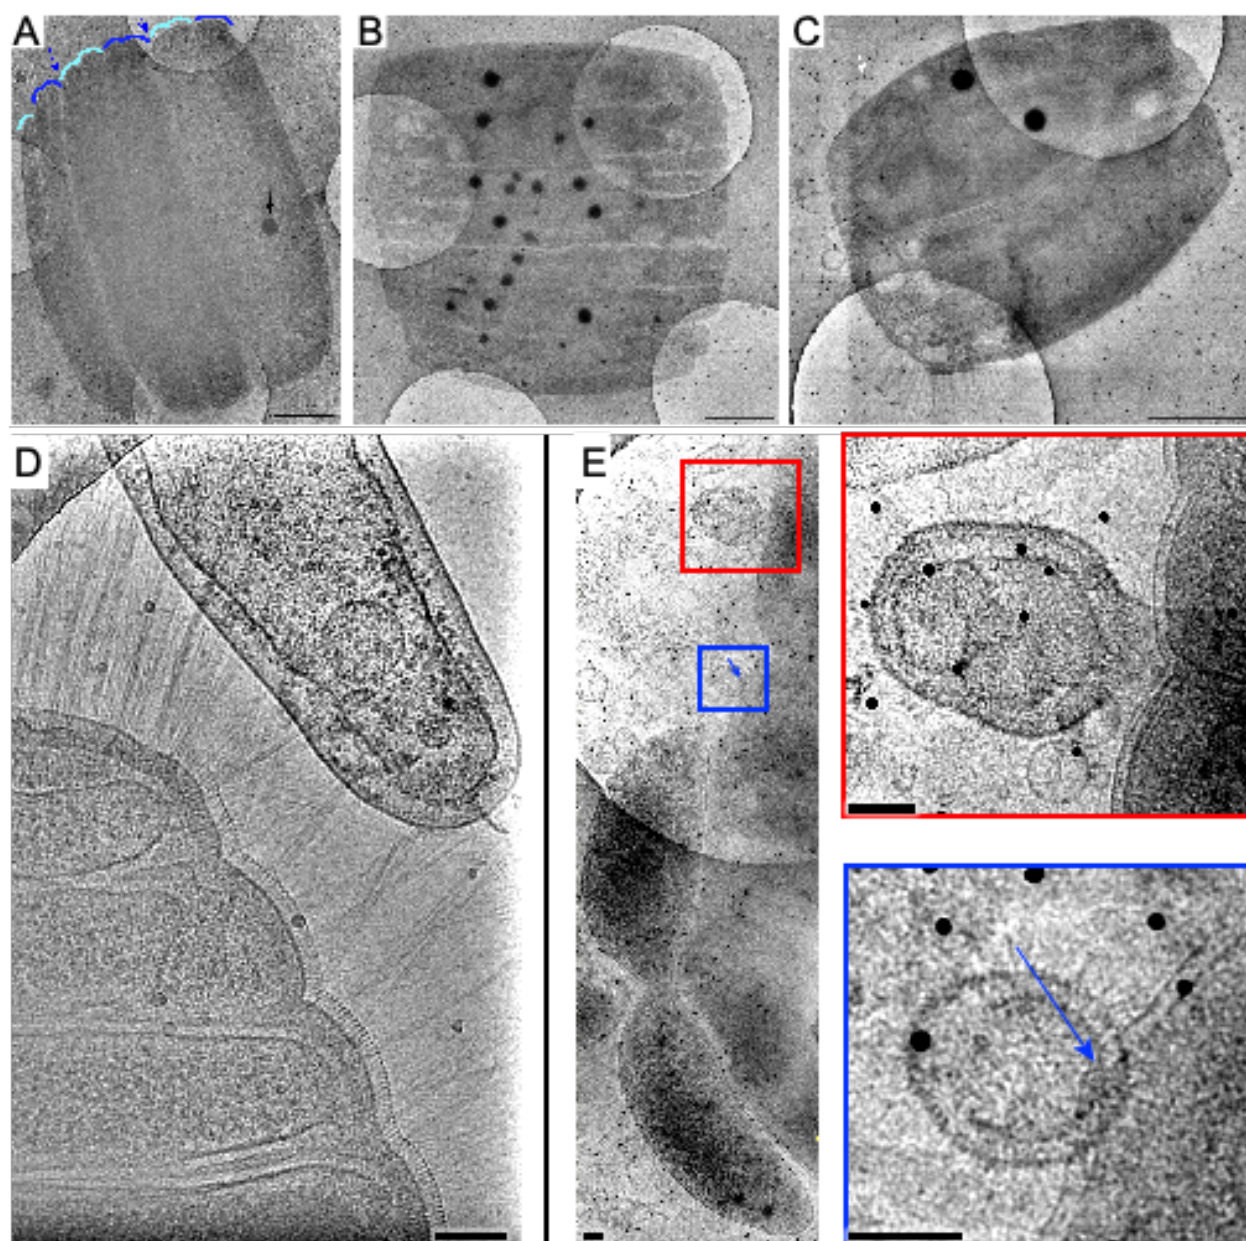

483

484 **Figure 5. CryoTEM demonstrates that RCUs consist of multiple parallel, likely**  
485 **paired segments and are often near other cells.** Band-pass filtered and denoised low  
486 magnification (A) and images or montage cryoTEM images of RCUs on an R2/2 holey  
487 carbon TEM grid (B-E). In (A), pairs of segments are highlighted with alternating shades  
488 of blue, and sharp indentations between groups of segments are denoted with blue  
489 arrows. Dense spheroidal objects inside RCUs may be storage granules or lipid droplets  
490 (black arrow). (D, E) RCUs were often in close physical proximity to other cells. In (E), an

491 apparent small indentation (blue arrow) in the RCU periodic surface covering overlaps  
492 with a non-RCU cell. Small dark spots (15 nm) in (C-E) are gold fiducial particles for  
493 cryoET experiments (white arrow). Scale bars: 1  $\mu\text{m}$ .

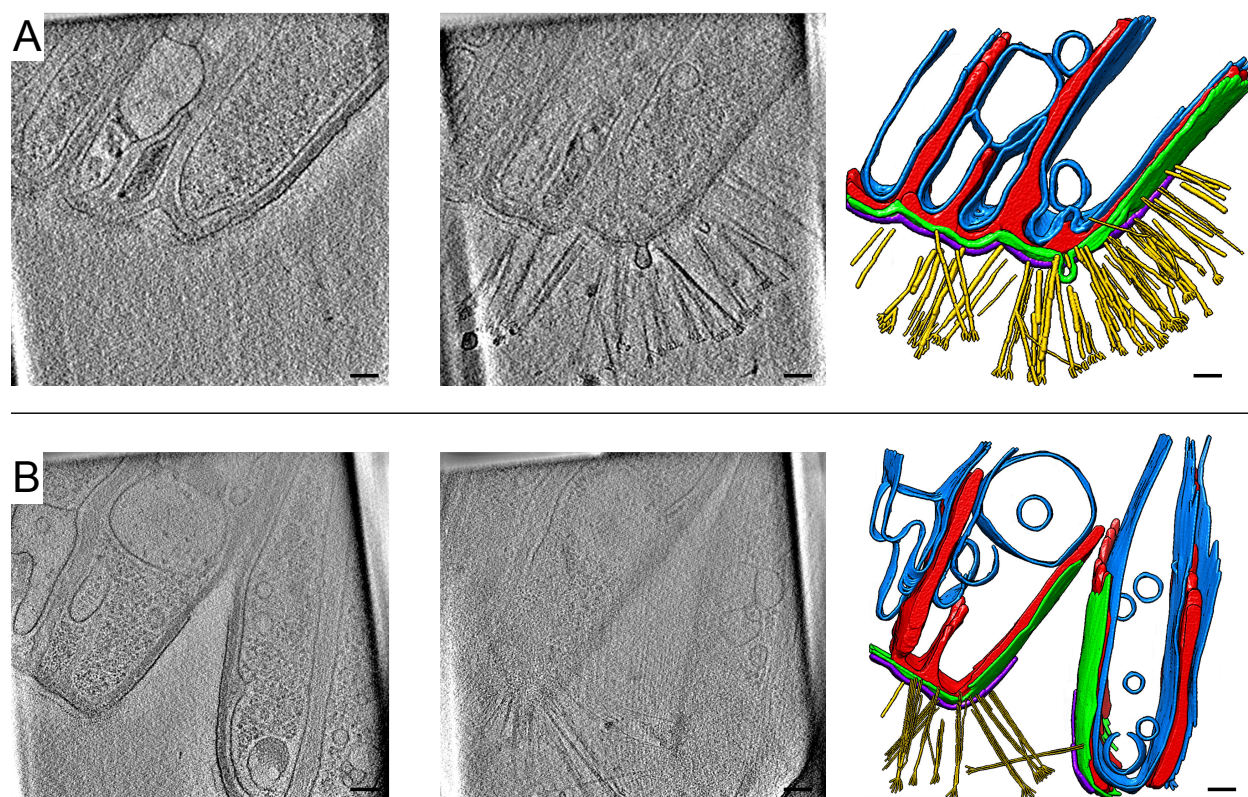

494

495 **Figure 6. CryoET reveals the three-dimensional architecture of RCU components.**

496 A, B) Examples of ~3 nm-thick slices at two different depths (left and center) from two  
497 representative RCU tomograms, and corresponding manual annotations of cellular  
498 features (right). The tomograms are thick (~500-600 nm) and as such, pilus-like  
499 appendages (yellow) were visible only at a certain depth within the tomographic volume  
500 density of the RCU. See also **Movies S2 and S3**. Blue, inner membranes; purple, periodic  
501 surface covering; green, outer membrane; red, matrix. Scale bars: 100 nm.

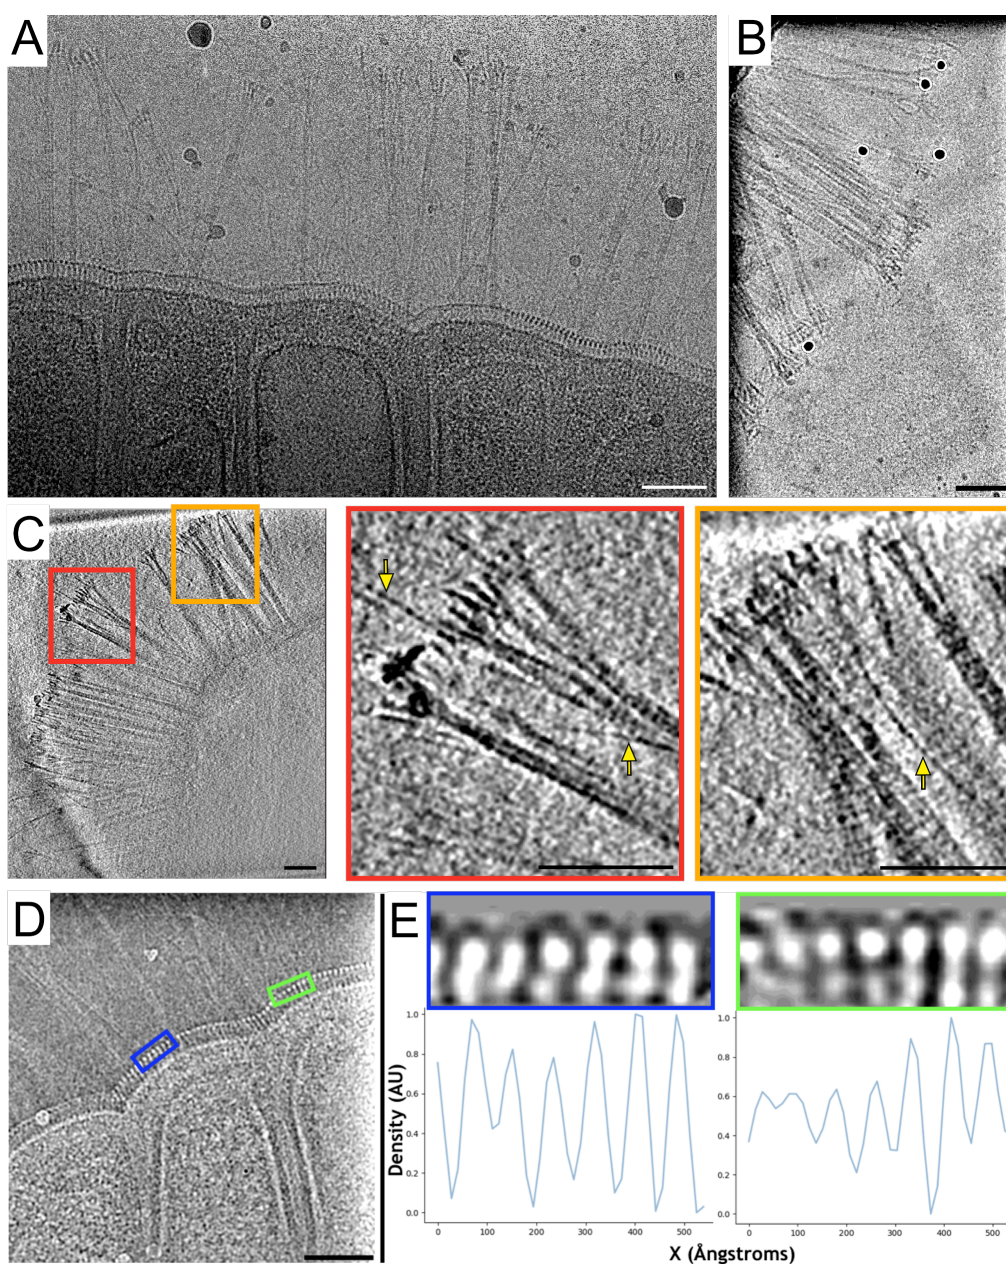

502

503 **Figure 7. RCU surface features include appendages in heterogeneous bundles that**  
504 **splay out at the tips and a periodic surface covering around the entire RCU.**

505 A) A single cryoTEM image.

506 B,C) CryoET tomographic slices (~3-nm thick) of an RCU. Red and orange boxes in  
507 (C) are magnified views of bundles of appendages, and yellow arrows denote thin,  
508 single appendages. Scale bars: 100 nm.

509 D) Representative 2D cryoTEM image at the edge of an RCU showing a periodic  
510 surface covering.

511 E) Line density profiles along selected regions from the image in (D) show that the  
512 spacing of the repetitive features is ~7-9 nm along a direction parallel to the RCU  
513 membrane. Scale bar: 100 nm.

514 **STAR METHODS**

515

516 **RESOURCE AVAILABILITY**

517

518 **Lead contact**

519 Further information and requests for resources and reagents should be directed to and  
520 will be fulfilled by the Lead Contact, David Relman (relman@stanford.edu).

521

522 **Materials availability**

523 This study did not generate new unique reagents.

524

525 **Data and code availability**

526 Raw single-cell sequence reads and 16S rRNA sequence reads are available through  
527 NCBI BioProject database PRJNA174530 with BioSample identifiers SAMN19013666,  
528 SAMN19013667, and SAMN19013668.

529

530 **EXPERIMENTAL MODEL AND SUBJECT DETAILS**

531 Oral swab samples were obtained from bottlenose dolphins (*Tursiops truncatus*)  
532 managed by the U.S. Navy Marine Mammal Program (MMP) Biosciences Division, Space  
533 and Naval Warfare Systems Center Pacific, San Diego, USA. The earliest sample  
534 containing RCUs was collected on April 1, 2012 and the latest on February 22, 2018.  
535 Samples were obtained by swabbing the roof of the mouth, the tongue, and between the  
536 tongue and mandible. Swabs were obtained using sterile foam Catch-All sample  
537 collection swabs (Epicenter, WI, Cat. #QEC091H). The swabbing protocol adhered to the  
538 guidelines described in the CRC Handbook of Marine Mammal Medicine. The MMP is

539 accredited by the Association for Assessment and Accreditation of Laboratory Animal  
540 Care (AAALAC) International and adheres to the national standards of the United States  
541 Public Health Service Policy on the Humane Care and Use of Laboratory Animals and  
542 the Animal Welfare Act. As required by the U.S. Department of Defense, the MMP's  
543 animal care and use program is routinely reviewed by an Institutional Animal Care and  
544 Use Committee (IACUC) and by the U.S. Navy Bureau of Medicine and Surgery. The  
545 animal use and care protocol for MMP dolphins in support of this study was approved by  
546 the MMP's IACUC and the Navy's Bureau of Medicine and Surgery (IACUC #92-2010,  
547 BUMED NRD-681). Samples were collected during 2012 and 2018.

548

## 549 ***METHOD DETAILS***

550

### 551 **Microscopy sample preparation**

552 To separate cells from swabs, swabs were immersed in 1X PBS (~50-100  $\mu$ L, depending  
553 on cell density) in microcentrifuge tubes. Tubes were vortexed vigorously for ~10 s and  
554 lightly centrifuged to remove liquid from tube caps. The resulting solution was used for  
555 microscopy.

556

### 557 **Light microscopy**

558 Approximately 1  $\mu$ L of cell solution in PBS was spotted onto an agarose pad (1% agarose  
559 in PBS) and imaged with an Eclipse Ti-E inverted microscope with a 100X (NA: 1.4)  
560 objective (Nikon, Tokyo, Japan). To determine DNA localization, cells were stained with  
561 DAPI at a final concentration of 0.5  $\mu$ g/mL prior to imaging for 5 min and imaged using  
562 emission/excitation spectra of 340/488 nm.

563



564 **Gram staining**

565 Gram staining was performed using a PREVI COLOR GRAM automated machine  
566 (bioMerieux, Marcy-l'Étoile, France).

567

568 **RCU cryofixation and cryoEM/ET data acquisition**

569 A solution of cells in PBS (2.5  $\mu$ L) was applied to glow-discharged 200-mesh copper,  
570 holey-carbon Quantifoil grids (Quantifoil, Großlöbichau, Germany, Cat. #Q2100CR1) with  
571 holey carbon or gold GridFinder Quantifoil grids (Quantifoil, Großlöbichau, Germany, Cat.  
572 #LFH2100AR2), followed by application of 2  $\mu$ L of 15-nm gold fiducial solution to both  
573 sides of each grid. Grids were blotted for 5 s and plunge-frozen in liquid ethane cooled  
574 by liquid nitrogen to approximately -195 °C using an EM GP Plunge Freezer (Leica,  
575 Wetzlar, Germany).

576

577 Samples were loaded into one of two microscopes: a Titan Krios G3 operated at 300 kV  
578 with an energy filter (20-eV slit width), or a Titan Krios G4 operated at 300 kV without an  
579 energy filter. Both microscopes were equipped with a K2 Summit direct electron detection  
580 device (Gatan, Pleasanton, USA) used to record micrographs. Data were acquired semi-  
581 automatically in counting mode using SerialEM (Mastronarde, 2003). CryoEM/ET imaging  
582 parameters are provided in **Table S5**.

583

584 **CryoEM/ET data processing**

585 Montages were blended and binned 4-fold or greater using IMOD's "blendmont" algorithm  
586 (Kremer et al., 1996) and normalized, band-pass filtered, rotated, and cropped for display  
587 purposes using EMAN2 (Tang et al., 2007). Fifteen out of sixteen tilt series were suitable  
588 for tomographic reconstruction in IMOD. Tilt series with sampling at 7.5 Å/pixel were

589 down-sampled by 2-fold and those with sampling at 3.48 Å/pixel or 3.75 Å/pixel were  
590 down-sampled by 4-fold. Images with artifacts such as excessive charging, drifting, large  
591 ice contamination creeping in at high tilts, or excessive thickness at high tilt were excluded  
592 from 12 of the tilt series prior to manual gold-fiducial-based alignment; up to 13 images  
593 were removed out of the 41 images in the original raw tilt series. Tomograms were  
594 reconstructed using standard weighted back-projection and a SIRT-like filter (mimicking  
595 16 iterations) and were band-pass-filtered and further binned by 2-fold in most cases for  
596 feature annotation, segmentation, movie production, and other display purposes.  
597 Tomogram thickness was estimated by visually identifying the smallest and largest z-  
598 slices with visible RCU or ice contamination densities and converting the number of slices  
599 to nanometers. Subtomogram averaging was attempted using EMAN2 (Galaz-Montoya  
600 et al., 2015; Galaz-Montoya et al., 2016) for globular densities suspected to be ribosomes,  
601 matrix densities under the outer membrane, patches of the periodic surface covering, and  
602 regions of pilus-like appendages, but no interpretable structures with resolution better  
603 than ~50 Å were attained. The ranges of thickness and length for the pilus-like  
604 appendages were derived by visually scanning the slices in the tomograms for the  
605 thinnest individual filaments and thickest bundles perceptible to the naked eye, and  
606 measuring their dimensions in binned-by-4 tomographic slices using the measuring tape  
607 tool of EMAN2's `e2display.py`. The repeat distance of the periodic surface covering  
608 was measured manually in a similar fashion as the pilus-like appendages from  
609 tomographic slices, with ~10-20 measurements from each of three tomograms displaying  
610 at least small regions where the repeat was discernible. This quantification yielded a  
611 range between ~6 and 10 nm, suggesting that either the layer components are flexible or  
612 that the underlying structure can yield different apparent distances between its subunits  
613 depending on the angle at which it is sliced. Additionally, regions showing the pattern

614 much more clearly in higher-magnification montage two-dimensional projection images  
615 were cropped out, rotated to lie in a horizontal plane, filtered, and masked to compute  
616 line-density profiles parallel to the outer membrane. This strategy allowed measurement  
617 of the distance between consecutive peaks and/or consecutive valleys, yielding values  
618 between ~7-9 nm.

619  
620 We initially carried out tomographic annotation of three features (periodic surface  
621 covering, lipid membranes, and pilus-like appendages) for three tomograms using  
622 EMAN2's semi-automated two-dimensional neural network-based pipeline (Chen et al.,  
623 2017) and performed manual clean-up of false positives in UCSF Chimera (Pettersen et  
624 al., 2004). The output annotation probability maps from EMAN2 were turned into  
625 segmentations by applying a threshold that was visually satisfying and multiplying the  
626 contrast-reversed tomograms by the thresholded annotation map. The segmentations  
627 were low-pass-filtered with EMAN2 to smooth out noise. However, since the complexity  
628 of subcellular structures was not captured by the semi-automated annotations, we applied  
629 a similar process to generate segmentations of five features (pilus-like appendages,  
630 periodic surface covering, outer membrane, matrix, and inner membranes) using manual  
631 annotations performed with IMOD. Snapshots for **Figure 6** displaying RCU features in  
632 color as well as **Movies S2 and 3** showing segmentation results were produced with  
633 UCSF Chimera.

634

### 635 **Fluorescence *in situ* Hybridization**

636 Cell cultures of axenic *Escherichia coli* MG1655 and non-axenic *Skeletonema costatum*  
637 LB 2308 (UTEX Culture Collection of Algae at the University of Texas at Austin, Austin,  
638 TX, USA) were prepared as controls. *E. coli* was cultured in LB broth and grown at 37 °C,

639 and *S. costatum* was cultured in Erdschreiber's Medium at 20 °C with a ~12 h light and  
640 ~12 h dark cycle.

641  
642 Probes Bact-338 and Euk-1209 were used to identify bacterial and eukaryotic cells,  
643 respectively. Probes were ordered from Integrated DNA Technologies (Coralville, USA)  
644 with HPLC purification as follows: Euk-1209 labeled with Alexa Fluor 660  
645 (GGGCATCACAGACCTG/3AlexF660N) and Bact338 labeled with Alexa Fluor 488  
646 (GCTGCCTCCCGTAGGAGT/3AlexF488N).

647  
648 Cells from controls and RCUs were collected in microcentrifuge tubes. To ensure  
649 sufficient biomass from dolphin oral swabs, cells from four swabs were condensed into a  
650 single tube. The FISH protocol was adapted from (Skinner et al., 2013). Cells were fixed  
651 in 1 mL of 3.7% formaldehyde solution (800 µL DEPC-treated water, 100 µL 10X PBS,  
652 100 µL 37% formaldehyde) for 30 min with gentle shaking at 700 rpm. Cells were then  
653 washed twice in 1 mL of 1X PBS, and permeabilized in a mixture of 300 µL DEPC-treated  
654 water and 700 µL 200-proof ethanol with gentle shaking at 700 rpm for 2 h. Probes were  
655 added to 50 µL of 40% hybridization solution (5 mL DEPC-water, 1 g dextran sulfate, 3.53  
656 mL formamide, 1 mL 2X SSC, brought to a total volume of 10 mL with DEPC-treated  
657 water) to a final concentration of 1 µM per probe set. Cells were incubated overnight in  
658 50 µL of hybridization buffer with FISH probes at 30 °C. Cells were washed twice using a  
659 wash solution (2 mL 20X SSC buffer, 7.06 mL formamide, 10.94 mL DEPC-treated water)  
660 and resuspended in 2X SSC buffer.

661  
662 Imaging data were processed using FIJI v. 2.0.0 (Schindelin et al., 2012).

663

## 664 **16S rRNA amplicon sequencing and processing**

665 Three dolphin oral samples that were confirmed to contain RCUs with long DAPI bands  
666 were selected for 16S rRNA amplicon sequencing. DNA was extracted using the QiaAMP  
667 DNA Mini Kit (Qiagen, Valencia, USA, Cat. #51304) as described in (Bik et al., 2016). The  
668 V4 region of the 16S rRNA gene was PCR-amplified in triplicate using barcoded 515F  
669 forward primers and the 806RB reverse primer. PCR was performed in triplicate using the  
670 5 Prime Hot Master Mix (Quantabio, Beverly, USA Cat. #2200410). PCR products were  
671 purified using the UltraClean 96 PCR Cleanup Kit (Qiagen, Valencia, USA, Cat. #12596-  
672 4) and pooled in equimolar ratio following DNA quantification using the Quant-iT dsDNA  
673 assay kit (Thermo Fisher Scientific, Waltham, USA, Cat. #Q33120). Finally, DNA was run  
674 through a Zymo Clean and Concentrate Spin Column (Zymo Research Corporation,  
675 Irvine, USA, Cat. #D4029) and further purified using the QIAquick gel extraction kit  
676 (Qiagen, Hilden, Germany, Cat. #28704). Amplicons were sequenced in a single 2x250  
677 nt Illumina HiSeq 2500 lane at the W. M. Keck Center for Comparative Functional  
678 Genomics at the University of Illinois, Urbana-Champaign.

679  
680 Demultiplexing was performed using QIIME v. 1.9.1 (Caporaso et al., 2010). Amplicon  
681 sequencing variants (ASVs) were inferred using DADA2 v. 1.6.0 (Callahan et al., 2016),  
682 following guidelines in the "Big Data Workflow"  
683 ([https://benjjneb.github.io/dada2/bigdata\\_paired.html](https://benjjneb.github.io/dada2/bigdata_paired.html)). Forward and reverse reads were  
684 trimmed to 245 nt and 200 nt, respectively. ASVs were inferred separately for forward  
685 and reverse reads using lane-specific error-rate profiles, and paired reads were merged.  
686 The "removeBimeraDenovo" function in DADA2 was used to identify and remove  
687 chimeras from sample datasets and taxonomic assignments were created using the  
688 DADA2 "assignTaxonomy" and "assignSpecies" functions, using RDP training set 16 as

689 a reference database (Cole et al., 2014). Additional stringent filtering of amplicons was  
690 performed, using VSEARCH v. 2.8.0 to remove chimeras (Rognes et al., 2016), BLAST  
691 v. 2.7.1 (Altschul et al., 1990) and the 16S rRNA gene set in (Schulz et al., 2017) to retain  
692 only bacterial 16S rRNA genes (e.g. to remove chloroplast 16S rRNA genes), scripts to  
693 remove abnormally short ASVs (<1200 bp) or those that contained N's or X's, and  
694 Decontam v. 0.99.3 to remove contaminant ASVs (Davis et al., 2018). This pipeline  
695 yielded a total of 394 taxa and 991,592 reads across the three samples.

696

### 697 **Single-cell genomics**

698 To obtain candidate identities for RCUs, we employed a single-cell genomics approach.  
699 To limit contamination by foreign DNA, reagents, tubes, and PBS were treated with 11.4  
700 J/cm<sup>2</sup> of ultraviolet light following the guidelines in (Woyke et al., 2011). RCUs were  
701 visualized with an Olympus IX70 inverted microscope (Olympus, Waltham, USA) with a  
702 40X objective and Hoffman modulation optics. An Eppendorf TransferMan  
703 micromanipulator (Eppendorf, Hamburg, Germany, Cat. #5193000020) with a SAS-10  
704 microinjector was used to capture RCUs with Polar Body Biopsy Micropipettes (30°  
705 angled, beveled, and polished with an inner diameter of 13-15 µm) (Cooper Surgical,  
706 Måløv, Denmark, Cat. #MPB-BP-30). After an RCU or chain of RCUs was acquired, the  
707 micropipette tip was transferred to a collection tube containing 1X PBS and crushed into  
708 the tube to ensure the RCU(s) was deposited in the tube; this precaution was adopted  
709 because RCUs frequently stuck to the glass micropipettes and could not be dislodged.  
710 No dolphin cells were captured, although cell-free DNA and small, non-target cells from  
711 the sample were likely acquired as contaminants along with RCUs based on the  
712 propensity for attachment of other species (**Figure 5E**). Four tubes of RCUs were  
713 collected (sample names RCU1, RCU2, RCU3, RCU4), along with four negative-control

714 tubes (NEG1, NEG2, NEG3, NEG4). Negative controls consisted of draws of PBS from  
715 the same sample that did not contain any visible cells, and were otherwise treated  
716 identically to RCU-containing samples.

717

718 DNA from each tube was amplified via multiple displacement amplification (MDA) using  
719 the Repli-g single-cell kit (Qiagen, Hilden, Germany, Cat. #150343) according to the  
720 manufacturer's protocol. DNA was purified using a Zymo Clean and Concentrate Spin  
721 Column (Zymo Research Corporation, Irvine, USA, Cat. #D4013) and libraries were  
722 prepared using the Kapa Hyper Prep Kit (Kapa Biosystems, Wilmington, USA, Cat.  
723 #KK8504) at the W.M. Keck Center for Comparative Functional Genomics at the  
724 University of Illinois, Urbana-Champaign. The eight libraries were sequenced using the  
725 Illumina MiSeq 2x250 nt P2 V2 platform. RCU samples RCU1, RCU2, NEG1, and NEG2  
726 were pooled and sequenced across a single lane that produced 11,371,243 read pairs,  
727 and samples RCU3, RCU4, NEG3, and NEG4 were pooled and sequenced across 1.5  
728 lanes, collectively producing 19,615,690 read pairs. Sequencing adaptors were  
729 computationally removed at the Keck Center.

730

731 Reads from all eight samples were co-assembled using SPAdes v. 3.11.1 (Bankevich et  
732 al., 2012) with the single cell (`-sc`) and careful (`-careful`) modes specified. A total of  
733 61,973,866 read pairs were used for assembly, resulting in 1,406 scaffolds  $\geq 5$  kbp long  
734 with a total length of 17,438,233 bp and an N50 of 14,592 for scaffolds  $\geq 5$  kbp long.  
735 Protein coding genes were identified using Prodigal v. 2.6.2 (Hyatt et al., 2010). Per  
736 scaffold average coverage was calculated by mapping reads per sample against the co-  
737 assembly using bowtie2 v. 2.2.4 (Langmead and Salzberg, 2012), using the samtools v.

738 1.6 depth function (Li et al., 2009) to calculate per-base read coverage, and a custom  
739 script to calculate average per-base read coverage per scaffold.

740

741 To determine the taxonomic identity of sequenced cells, we employed a genome-resolved  
742 approach. Assignment of scaffolds to genome bins was performed using the  
743 tetranucleotide frequencies of all scaffolds  $\geq 5$  kbp long over windows of 5 kbp, as  
744 described in (Dick et al., 2009). Results were computed and visualized using the  
745 Databionics ESOM Tools software v. 1.1 (Ultsch and Mörchen, 2005), leading to the  
746 reconstruction of 18 genome bins (**Figure S3**). To refine bins, we removed scaffolds for  
747 which  $< 50\%$  of keys were assigned to the bin. Scaffolds  $< 5$  kbp long were not binned.  
748 The completeness and contamination per bin were assessed using CheckM v. 1.0.7  
749 (Parks et al., 2015). To evaluate how representative binning was of the genomes that  
750 were sequenced, we estimated the number of prokaryotic genomes expected to be  
751 recovered by searching the metagenome assembly for a set of 16 bacterial single copy  
752 genes (bSCGs) assumed to be present in every genome in a single copy (Hug et al.,  
753 2013). The median number of each bSCG was 10, suggesting  $\sim 10$  prokaryotic genomes  
754 were represented in our sequencing dataset.

755

756 Taxonomic identification of bins posed a challenge since 16S/18S rRNA genes were not  
757 reliably amplified/sequenced/assembled, and genomes were partial with few  
758 phylogenetically informative bacterial single copy genes (Hug et al., 2013) present in the  
759 dataset. Hence, we used BLAST v. 2.2.30 (Altschul et al., 1990) to query all protein coding  
760 genes from each genome against the NCBI non-redundant protein database using an e-  
761 value of  $10^{-10}$  and taxonomic assignments were made based on the closest protein match.  
762 Genome bin taxonomic assignments were considered highly likely if  $\geq 50\%$  of the top blast



763 hits originated from a single taxon and were considered to be plausible if <50% but ≥33%  
764 of the top blast hits originated from a single taxon.

765  
766 There are numerous approaches by which one could assess whether a bin is “present” in  
767 a sample, each with largely arbitrary thresholds. We focused on the relative abundance  
768 of each bin per sample (**Table S4**) as it accounts for the length of each bin and allows for  
769 comparisons between samples with different numbers of read pairs (Dudek et al., 2017).

770

### 771 **Attempt at culturing RCUs**

772 Two dolphin oral samples confirmed to contain RCUs were selected for culturing efforts.  
773 For each sample, one milliliter of sterile PBS was added to a 1.5-mL Eppendorf tube  
774 containing the oral swab sample. Six hundred microliters of each sample were used to  
775 inoculate 3 mL of BSTYS (Kuhn et al., 1978) (2.75% w/v Tryptic Soy Broth, 0.4% w/v  
776 yeast extract, 1.5% w/v agar, 10% bovine serum), SHI (Tian et al., 2010), or mSHI media  
777 (SHI supplemented with 0.9 g/L NaCl, 2.5 g/L K<sub>2</sub>PO<sub>4</sub>, 0.84 g/L NaHCO<sub>3</sub>, 0.17 g/L CaCl<sub>2</sub>,  
778 0.04 g/L MgCl<sub>2</sub> \* 6H<sub>2</sub>O, and 5 g/L of dextrose), in liquid form and on thin layer agar plates.  
779 BSTYS was selected for its use in successfully culturing bacteria (*Simonsiella* specifically)  
780 from the oral cavities of various mammals (Kuhn et al., 1978). SHI was selected because  
781 this medium was designed to sustain high diversity communities derived from the human  
782 oral microflora. mSHI (modified-SHI) was included as a higher-salinity version of SHI in  
783 an attempt to further mimic the conditions that might be found in the oral cavity of dolphins.  
784 Inoculation was repeated under anaerobic conditions in an anaerobic chamber (COY Lab  
785 Products, Grass Lake, USA); note that all samples were unavoidably exposed to  
786 atmospheric oxygen prior to culturing. Cultures were incubated at 37 °C to mimic the body

787 temperature of dolphins. No RCUs were detected on solid media or in liquid media by  
788 visual screening under a microscope after ~24, ~48, ~72, and ~96 h.

789

## 790 ***QUANTIFICATION AND STATISTICAL ANALYSIS***

791 Detailed descriptions of the quantitative methods used in this paper can be found in the  
792 Results and Method Details sections. Briefly, these descriptions include the methods  
793 used for DNA extraction, sequencing, read quality filtering and analysis, and microscopy  
794 data acquisition.

795 **REFERENCES**

- 796
- 797 Alam, M., Claviez, M., Oesterhelt, D., and Kessel, M. (1984). Flagella and motility  
798 behaviour of square bacteria. *EMBO J* 3, 2899-2903.
- 799 Altschul, S.F., Gish, W., Miller, W., Myers, E.W., and Lipman, D.J. (1990). Basic local  
800 alignment search tool. *J Mol Biol* 215, 403-410.
- 801 Anantharaman, K., Brown, C.T., Hug, L.A., Sharon, I., Castelle, C.J., Probst, A.J.,  
802 Thomas, B.C., Singh, A., Wilkins, M.J., Karaoz, U., *et al.* (2016). Thousands of microbial  
803 genomes shed light on interconnected biogeochemical processes in an aquifer system.  
804 *Nat Commun* 7, 13219.
- 805 Apprill, A., Mooney, T.A., Lyman, E., Stimpert, A.K., and Rappe, M.S. (2011). Humpback  
806 whales harbour a combination of specific and variable skin bacteria. *Environ Microbiol*  
807 *Rep* 3, 223-232.
- 808 Bankevich, A., Nurk, S., Antipov, D., Gurevich, A.A., Dvorkin, M., Kulikov, A.S., Lesin,  
809 V.M., Nikolenko, S.I., Pham, S., Pribelski, A.D., *et al.* (2012). SPAdes: a new genome  
810 assembly algorithm and its applications to single-cell sequencing. *J Comput Biol* 19, 455-  
811 477.
- 812 Bik, E.M., Costello, E.K., Switzer, A.D., Callahan, B.J., Holmes, S.P., Wells, R.S., Carlin,  
813 K.P., Jensen, E.D., Venn-Watson, S., and Relman, D.A. (2016). Marine mammals harbor  
814 unique microbiotas shaped by and yet distinct from the sea. *Nat Commun* 7, 10516.
- 815 Brown, C.T., Hug, L.A., Thomas, B.C., Sharon, I., Castelle, C.J., Singh, A., Wilkins, M.J.,  
816 Wrighton, K.C., Williams, K.H., and Banfield, J.F. (2015). Unusual biology across a group  
817 comprising more than 15% of domain Bacteria. *Nature* 523, 208-211.

818 Burstein, D., Harrington, L.B., Strutt, S.C., Probst, A.J., Anantharaman, K., Thomas, B.C.,  
819 Doudna, J.A., and Banfield, J.F. (2017). New CRISPR-Cas systems from uncultivated  
820 microbes. *Nature* 542, 237-241.

821 Callahan, B.J., McMurdie, P.J., Rosen, M.J., Han, A.W., Johnson, A.J., and Holmes, S.P.  
822 (2016). DADA2: High-resolution sample inference from Illumina amplicon data. *Nat*  
823 *Methods* 13, 581-583.

824 Caporaso, J.G., Kuczynski, J., Stombaugh, J., Bittinger, K., Bushman, F.D., Costello,  
825 E.K., Fierer, N., Pena, A.G., Goodrich, J.K., Gordon, J.I., *et al.* (2010). QIIME allows  
826 analysis of high-throughput community sequencing data. *Nat Methods* 7, 335-336.

827 Castelle, C.J., and Banfield, J.F. (2018). Major New Microbial Groups Expand Diversity  
828 and Alter our Understanding of the Tree of Life. *Cell* 172, 1181-1197.

829 Castelle, C.J., Wrighton, K.C., Thomas, B.C., Hug, L.A., Brown, C.T., Wilkins, M.J.,  
830 Frischkorn, K.R., Tringe, S.G., Singh, A., Markillie, L.M., *et al.* (2015). Genomic expansion  
831 of domain archaea highlights roles for organisms from new phyla in anaerobic carbon  
832 cycling. *Curr Biol* 25, 690-701.

833 Chen, M., Dai, W., Sun, S.Y., Jonasch, D., He, C.Y., Schmid, M.F., Chiu, W., and Ludtke,  
834 S.J. (2017). Convolutional neural networks for automated annotation of cellular cryo-  
835 electron tomograms. *Nat Methods* 14, 983-985.

836 Cole, J.R., Wang, Q., Fish, J.A., Chai, B., McGarrell, D.M., Sun, Y., Brown, C.T., Porras-  
837 Alfaro, A., Kuske, C.R., and Tiedje, J.M. (2014). Ribosomal Database Project: data and  
838 tools for high throughput rRNA analysis. *Nucleic Acids Res* 42, D633-642.

839 Danev, R., and Baumeister, W. (2017). Expanding the boundaries of cryo-EM with phase  
840 plates. *Curr Opin Struct Biol* 46, 87-94.

841 Davis, N.M., Proctor, D.M., Holmes, S.P., Relman, D.A., and Callahan, B.J. (2018).  
842 Simple statistical identification and removal of contaminant sequences in marker-gene  
843 and metagenomics data. *Microbiome* 6, 226.

844 Dick, G.J., Andersson, A.F., Baker, B.J., Simmons, S.L., Thomas, B.C., Yelton, A.P., and  
845 Banfield, J.F. (2009). Community-wide analysis of microbial genome sequence  
846 signatures. *Genome Biol* 10, R85.

847 Donia, M.S., Cimermancic, P., Schulze, C.J., Wieland Brown, L.C., Martin, J., Mitreva,  
848 M., Clardy, J., Linington, R.G., and Fischbach, M.A. (2014). A systematic analysis of  
849 biosynthetic gene clusters in the human microbiome reveals a common family of  
850 antibiotics. *Cell* 158, 1402-1414.

851 Dudek, N.K., Sun, C.L., Burstein, D., Kantor, R.S., Aliaga Goltsman, D.S., Bik, E.M.,  
852 Thomas, B.C., Banfield, J.F., and Relman, D.A. (2017). Novel Microbial Diversity and  
853 Functional Potential in the Marine Mammal Oral Microbiome. *Curr Biol* 27, 3752-3762  
854 e3756.

855 Dworkin, M. (1999). Introduction to the myxobacteria. *Prokaryotic Development*, 219-242.

856 Fagan, R.P., and Fairweather, N.F. (2014). Biogenesis and functions of bacterial S-  
857 layers. *Nat Rev Microbiol* 12, 211-222.

858 Fenno, L., Yizhar, O., and Deisseroth, K. (2011). The development and application of  
859 optogenetics. *Annu Rev Neurosci* 34, 389-412.

860 Galaz-Montoya, J.G., Flanagan, J., Schmid, M.F., and Ludtke, S.J. (2015). Single particle  
861 tomography in EMAN2. *J Struct Biol* 190, 279-290.

862 Galaz-Montoya, J.G., Hecksel, C.W., Baldwin, P.R., Wang, E., Weaver, S.C., Schmid,  
863 M.F., Ludtke, S.J., and Chiu, W. (2016). Alignment algorithms and per-particle CTF  
864 correction for single particle cryo-electron tomography. *J Struct Biol* 194, 383-394.

865 Galaz-Montoya, J.G., and Ludtke, S.J. (2017). The advent of structural biology in situ by  
866 single particle cryo-electron tomography. *Biophys Rep* 3, 17-35.

867 Hedlund, B.P., and Kuhn, D.A. (2006). The genera *Simonsiella* and *Alysiella*.

868 Horner, R.A. (2002). A taxonomic guide to some common marine phytoplankton.

869 Hospenthal, M.K., Costa, T.R.D., and Waksman, G. (2017). A comprehensive guide to  
870 pilus biogenesis in Gram-negative bacteria. *Nat Rev Microbiol* 15, 365-379.

871 Hug, L.A., Baker, B.J., Anantharaman, K., Brown, C.T., Probst, A.J., Castelle, C.J.,  
872 Butterfield, C.N., Hensdorf, A.W., Amano, Y., Ise, K., *et al.* (2016). A new view of the tree  
873 of life. *Nat Microbiol* 1, 16048.

874 Hug, L.A., Castelle, C.J., Wrighton, K.C., Thomas, B.C., Sharon, I., Frischkorn, K.R.,  
875 Williams, K.H., Tringe, S.G., and Banfield, J.F. (2013). Community genomic analyses  
876 constrain the distribution of metabolic traits across the Chloroflexi phylum and indicate  
877 roles in sediment carbon cycling. *Microbiome* 1, 22.

878 Hyatt, D., Chen, G.L., Locascio, P.F., Land, M.L., Larimer, F.W., and Hauser, L.J. (2010).  
879 Prodigal: prokaryotic gene recognition and translation initiation site identification. *BMC*  
880 *Bioinformatics* 11, 119.

881 Ishino, Y., Krupovic, M., and Forterre, P. (2018). History of CRISPR-Cas from Encounter  
882 with a Mysterious Repeated Sequence to Genome Editing Technology. *J Bacteriol* 200.

883 Kremer, J.R., Mastrorarde, D.N., and McIntosh, J.R. (1996). Computer visualization of  
884 three-dimensional image data using IMOD. *J Struct Biol* 116, 71-76.

885 Kuhn, D.A., Gregory, D.A., Buchanan, G.E., Jr., Nyby, M.D., and Daly, K.R. (1978).  
886 Isolation, characterization, and numerical taxonomy of *Simonsiella* strains from the oral  
887 cavities of cats, dogs, sheep, and humans. *Arch Microbiol* 118, 235-241.

888 Langmead, B., and Salzberg, S.L. (2012). Fast gapped-read alignment with Bowtie 2. *Nat*  
889 *Methods* 9, 357-359.

890 Leeuwenhoek, A.V. (1677). Observations, communicated to the publisher by Mr. Antony  
891 van Leewenhoek, in a dutch letter of the 9th Octob. 1676. here English'd: concerning  
892 little animals by him observed in rain-well-sea-and snow water; as also in water wherein  
893 pepper had lain infused. *Philosophical Transactions of the Royal Society of London* 12,  
894 821-831.

895 Leisch, N., Pende, N., Weber, P.M., Gruber-Vodicka, H.R., Verheul, J., Vischer, N.O.,  
896 Abby, S.S., Geier, B., den Blaauwen, T., and Bulgheresi, S. (2016). Asynchronous  
897 division by non-ring FtsZ in the gammaproteobacterial symbiont of *Robbea hypermnestra*.  
898 *Nat Microbiol* 2, 16182.

899 Li, H., Handsaker, B., Wysoker, A., Fennell, T., Ruan, J., Homer, N., Marth, G., Abecasis,  
900 G., Durbin, R., and Genome Project Data Processing, S. (2009). The Sequence  
901 Alignment/Map format and SAMtools. *Bioinformatics* 25, 2078-2079.

902 Limon, J.J., Skalski, J.H., and Underhill, D.M. (2017). Commensal Fungi in Health and  
903 Disease. *Cell Host Microbe* 22, 156-165.

904 Luef, B., Frischkorn, K.R., Wrighton, K.C., Holman, H.Y., Birarda, G., Thomas, B.C.,  
905 Singh, A., Williams, K.H., Siegerist, C.E., Tringe, S.G., *et al.* (2015). Diverse uncultivated  
906 ultra-small bacterial cells in groundwater. *Nat Commun* 6, 6372.

907 Marko, M., Hsieh, C., Schalek, R., Frank, J., and Mannella, C. (2007). Focused-ion-beam  
908 thinning of frozen-hydrated biological specimens for cryo-electron microscopy. *Nat*  
909 *Methods* 4, 215-217.

910 Mastronarde, D.N. (2003). SerialEM: a program for automated tilt series acquisition on  
911 Tecnai microscopes using prediction of specimen position. *Microscopy and Microanalysis*  
912 9, 1182-1183.

913 McCowan, R.P., Cheng, K.J., and Costerton, J.W. (1979). Colonization of a portion of the  
914 bovine tongue by unusual filamentous bacteria. *Appl Environ Microbiol* 37, 1224-1229.

915 Meheust, R., Burstein, D., Castelle, C.J., and Banfield, J.F. (2019). The distinction of CPR  
916 bacteria from other bacteria based on protein family content. *Nat Commun* 10, 4173.

917 Moissl, C., Rachel, R., Briegel, A., Engelhardt, H., and Huber, R. (2005). The unique  
918 structure of archaeal 'hami', highly complex cell appendages with nano-grappling hooks.  
919 *Mol Microbiol* 56, 361-370.

920 Nikitin, D., Vasilyeva, L., and Lokhmacheva, R. (1966). New and rare forms of soil  
921 microorganisms. M: Nauka.

922 Oren, A., Ventosa, A., Gutierrez, M.C., and Kamekura, M. (1999). *Haloarcula quadrata*  
923 sp. nov., a square, motile archaeon isolated from a brine pool in Sinai (Egypt). *Int J Syst*  
924 *Bacteriol* 49 Pt 3, 1149-1155.

925 Parks, D.H., Imelfort, M., Skennerton, C.T., Hugenholtz, P., and Tyson, G.W. (2015).  
926 CheckM: assessing the quality of microbial genomes recovered from isolates, single cells,  
927 and metagenomes. *Genome Res* 25, 1043-1055.

928 Pettersen, E.F., Goddard, T.D., Huang, C.C., Couch, G.S., Greenblatt, D.M., Meng, E.C.,  
929 and Ferrin, T.E. (2004). UCSF Chimera--a visualization system for exploratory research  
930 and analysis. *J Comput Chem* 25, 1605-1612.

931 Pilhofer, M., Ladinsky, M.S., McDowall, A.W., and Jensen, G.J. (2010). Bacterial TEM:  
932 new insights from cryo-microscopy. *Methods Cell Biol* 96, 21-45.

933 Ponomarova, O., and Patil, K.R. (2015). Metabolic interactions in microbial communities:  
934 untangling the Gordian knot. *Curr Opin Microbiol* 27, 37-44.

935 Proft, T., and Baker, E.N. (2009). Pili in Gram-negative and Gram-positive bacteria -  
936 structure, assembly and their role in disease. *Cell Mol Life Sci* 66, 613-635.

937 Rinke, C., Schwientek, P., Sczyrba, A., Ivanova, N.N., Anderson, I.J., Cheng, J.F.,  
938 Darling, A., Malfatti, S., Swan, B.K., Gies, E.A., *et al.* (2013). Insights into the phylogeny  
939 and coding potential of microbial dark matter. *Nature* 499, 431-437.



940 Rognes, T., Flouri, T., Nichols, B., Quince, C., and Mahe, F. (2016). VSEARCH: a  
941 versatile open source tool for metagenomics. *PeerJ* 4, e2584.

942 Schindelin, J., Arganda-Carreras, I., Frise, E., Kaynig, V., Longair, M., Pietzsch, T.,  
943 Preibisch, S., Rueden, C., Saalfeld, S., Schmid, B., *et al.* (2012). Fiji: an open-source  
944 platform for biological-image analysis. *Nat Methods* 9, 676-682.

945 Schulz, F., Eloë-Fadrosh, E.A., Bowers, R.M., Jarett, J., Nielsen, T., Ivanova, N.N.,  
946 Kyrpides, N.C., and Woyke, T. (2017). Towards a balanced view of the bacterial tree of  
947 life. *Microbiome* 5, 140.

948 Skinner, S.O., Sepulveda, L.A., Xu, H., and Golding, I. (2013). Measuring mRNA copy  
949 number in individual *Escherichia coli* cells using single-molecule fluorescent in situ  
950 hybridization. *Nat Protoc* 8, 1100-1113.

951 Sleytr, U.B., Huber, C., Ilk, N., Pum, D., Schuster, B., and Egelseer, E.M. (2007). S-layers  
952 as a tool kit for nanobiotechnological applications. *FEMS Microbiol Lett* 267, 131-144.

953 Steed, P.A. (1962). *Simonsiellaceae* fam.nov.with characterization of *Simonsiella crassa*  
954 and *Alysiella filiformis*. *J Gen Microbiol* 29, 615-624.

955 Tang, G., Peng, L., Baldwin, P.R., Mann, D.S., Jiang, W., Rees, I., and Ludtke, S.J.  
956 (2007). EMAN2: an extensible image processing suite for electron microscopy. *J Struct*  
957 *Biol* 157, 38-46.

958 Tian, Y., He, X., Torralba, M., Yooseph, S., Nelson, K.E., Lux, R., McLean, J.S., Yu, G.,  
959 and Shi, W. (2010). Using DGGE profiling to develop a novel culture medium suitable for  
960 oral microbial communities. *Mol Oral Microbiol* 25, 357-367.

961 Tocheva, E.I., Li, Z., and Jensen, G.J. (2010). Electron cryotomography. *Cold Spring*  
962 *Harb Perspect Biol* 2, a003442.

963 Ultsch, A., and Mörchen, F. (2005). ESOM-Maps: tools for clustering, visualization, and  
964 classification with Emergent SOM, Vol 46 (Univ.).

- 965 Vasilyeva, L. (1985). *Stella*, a New Genus of Soil Prostheco bacteria, with Proposals for  
966 *Stella humosa* sp. nov. and *Stella vacuolata* sp. nov. *International Journal of Systematic  
967 and Evolutionary Microbiology* 35, 518-521.
- 968 Voelz, H., and Reichenbach, H. (1969). Fine structure of fruiting bodies of *Stigmatella*  
969 *aurantiaca* (Myxobacterales). *J Bacteriol* 99, 856-866.
- 970 Walsby, A.E. (1980). A square bacterium. *Nature* 283, 69-71.
- 971 Wanger, G., Onstott, T.C., and Southam, G. (2008). Stars of the terrestrial deep  
972 subsurface: a novel 'star-shaped' bacterial morphotype from a South African platinum  
973 mine. *Geobiology* 6, 325-330.
- 974 Wildhaber, I., and Baumeister, W. (1987). The cell envelope of *Thermoproteus tenax*:  
975 three-dimensional structure of the surface layer and its role in shape maintenance. *EMBO  
976 J* 6, 1475-1480.
- 977 Woyke, T., Sczyrba, A., Lee, J., Rinke, C., Tighe, D., Clingenpeel, S., Malmstrom, R.,  
978 Stepanauskas, R., and Cheng, J.F. (2011). Decontamination of MDA reagents for single  
979 cell whole genome amplification. *PLoS One* 6, e26161.
- 980 Wrighton, K.C., Thomas, B.C., Sharon, I., Miller, C.S., Castelle, C.J., VerBerkmoes, N.C.,  
981 Wilkins, M.J., Hettich, R.L., Lipton, M.S., Williams, K.H., *et al.* (2012). Fermentation,  
982 hydrogen, and sulfur metabolism in multiple uncultivated bacterial phyla. *Science* 337,  
983 1661-1665.
- 984 Wu, D., Hugenholtz, P., Mavromatis, K., Pukall, R., Dalin, E., Ivanova, N.N., Kunin, V.,  
985 Goodwin, L., Wu, M., Tindall, B.J., *et al.* (2009). A phylogeny-driven genomic  
986 encyclopaedia of Bacteria and Archaea. *Nature* 462, 1056-1060.
- 987 Wu, G.H., Mitchell, P.G., Galaz-Montoya, J.G., Hecksel, C.W., Sontag, E.M.,  
988 Gangadharan, V., Marshman, J., Mankus, D., Bisher, M.E., Lytton-Jean, A.K.R., *et al.*

989 (2020). Multi-scale 3D Cryo-Correlative Microscopy for Vitrified Cells. *Structure* 28, 1231-  
990 1237 e1233.

991 Xu, Y., Zhou, P., and Tian, X. (1999). Characterization of two novel haloalkaliphilic  
992 archaea *Natronorubrum bangense* gen. nov., sp. nov. and *Natronorubrum tibetense* gen.  
993 nov., sp. nov. *Int J Syst Bacteriol* 49 Pt 1, 261-266.

994 Young, K.D. (2006). The selective value of bacterial shape. *Microbiol Mol Biol Rev* 70,  
995 660-703.

996 Young, K.D. (2007). Bacterial morphology: why have different shapes? *Curr Opin*  
997 *Microbiol* 10, 596-600.

998 Zinder, S.H., and Dworkin, M. (2006). Morphological and physiological diversity. *The*  
999 *prokaryotes A handbook on the biology of bacteria*, 3rd edn Springer, New York, 185-  
1000 220.

1001
